# Supplementary material for: Development of a Novel NGS Methodology for Ultrasensitive Circulating Tumor DNA Detection as a Tool for Early-Stage Breast Cancer Diagnosis
Source: Int J Mol Sci. 2022 Dec 21;24(1):146. doi: 10.3390/ijms24010146 (PMC9820510; doi:10.3390/ijms24010146)
Supplement: Supplementary file 1 [file ijms-24-00146-s001.zip › Supplementary Tables_S1-S8_revision.xlsx]

## Sheet: Table S1  
Table S1. Low-coverage regions observed in tumour and plasma sequencing. Genomic regions with more than 10% of the bases with less than 100X in coverage are shown. The presence of mutations in the TCGA BC data base in these regions are indicated.
	Low coverage regions				Bases in regions	Low Coverage Bases	Percentage Low Coverage Bases	Gencode Info			Mutations in TCGA BC
	Genomic coordinate			Gene							Yes/No	Mutation	Samples with mutation (%)
Tumour	chr13	32395961	32396170	BRCA2	209	24	11.48	transcript_name "BRCA2-202"	exon_number 4		No	-	-
	chr17	12020812	12021075	MAP2K4	263	60	22.81	transcript_name "MAP2K4-201"	exon_number 1		No	-	-
	chr17	16126002	16126289	NCOR1	287	61	21.25	transcript_name "NCOR1-201"	exon_number 15		Yes	chr17:g16126142_16126143insT	0.27
												chr17:g.16126125C>G	0.09
Plasma	chr13	48379973	48380322	RB1	349	37	10.60	transcript_name "RB1-201"	exon_number 15		Yes	chr13:g.48380237T>C	0.09
	chr17	12020812	12021075	MAP2K4	263	28	10.65	transcript_name "MAP2K4-201"	exon_number 1		No	-	-
	chr17	16126002	16126289	NCOR1	287	61	21.25	transcript_name "NCOR1-201"	exon_number 15		Yes	chr17:g16126142_16126143insT	0.27
												chr17:g.16126125C>G	0.09

## Sheet: Table S2
Table S2. Mutations found in tumours. Somatic variants are shown and whether they were observed in public data bases COSMIC, TCGA BC and TCGA all cancers (ALL). VAF, variant allele frequency; DP, sequencing depth; REF_AD, reads for the reference allele; MUT_AD, reads for the mutated allele; ctDNA, circulating tumour DNA.
Tumor mutations																	In ctDNA caller
Sample	Chr	Start	End	Ref	Alt	Func.ensGene	Gene.ensGene	ExonicFunc.ensGene	AAChange.ensGene	cosmic95	tcgaBC	tcgaALL	VAF	DP	REF_AD	MUT_AD
001MS	chr3	179234302	179234302	G	C	exonic	PIK3CA	nonsynonymous SNV	PIK3CA:ENST00000263967.3:exon21:c.G3145C:p.G1049R	ID=COSV55874453;OCCURENCE=2(urinary_tract),16(large_intestine),1(stomach),1(soft_tissue),2(pancreas),1(kidney),39(breast),1(cervix),11(endometrium),3(lung),2(ovary),3(upper_aerodigestive_tract),3(thyroid),1(skin),4(central_nervous_system),1(salivary_gland)	PIK3CA;c.3145G>C;p.G1049R;TCGA-BH-A2L8-01A-11D-A18P-09	PIK3CA;c.3145G>C;p.G1049R;TCGA-ZF-A9RE-01A-11D-A38G-08	0.146	3055	2611	444	No
002MS	chr16	68828254	68828254	C	T	exonic	CDH1	nonsynonymous SNV	CDH1:ENST00000422392.6:exon13:c.C2062T:p.R688W,CDH1:ENST00000261769.9:exon14:c.C2245T:p.R749W,CDH1:ENST00000611625.4:exon15:c.C2308T:p.R770W	ID=COSV99931786;OCCURENCE=1(stomach)	.	CDH1;c.2245C>T;p.R749W;TCGA-BR-8686-01A-11D-2394-08	0.053	1998	1892	106	No
	chr17	7675088	7675088	C	T	exonic	TP53	nonsynonymous SNV	TP53:ENST00000504290.5:exon1:c.G128A:p.R43H,TP53:ENST00000504937.5:exon1:c.G128A:p.R43H,TP53:ENST00000510385.5:exon1:c.G128A:p.R43H,TP53:ENST00000610623.4:exon1:c.G47A:p.R16H,TP53:ENST00000618944.4:exon1:c.G47A:p.R16H,TP53:ENST00000619186.4:exon1:c.G47A:p.R16H,TP53:ENST00000359597.8:exon4:c.G524A:p.R175H,TP53:ENST00000413465.6:exon4:c.G524A:p.R175H,TP53:ENST00000610292.4:exon4:c.G407A:p.R136H,TP5…	ID=COSV52661038;OCCURENCE=2(pleura),24(biliary_tract),9(vulva),1(eye),2(gastrointestinal_tract_(site_indeterminate)),5(cervix),21(kidney),181(breast),82(pancreas),14(soft_tissue),124(stomach),1(peritoneum),633(large_intestine),14(liver),40(urinary_tract),13(salivary_gland),81(haematopoietic_and_lymphoid_tissue),4(small_intestine),119(central_nervous_system),28(prostate),1(testis),6(adrenal_gland)…	TP53;c.524G>A;p.R175H;TCGA-BH-A0GY-01A-11W-A071-09	TP53;c.524G>A;p.R175H;TCGA-N5-A4RJ-01A-11D-A28R-08	0.545	2271	1033	1238	No
	chr3	179210186	179210186	G	A	exonic	PIK3CA	nonsynonymous SNV	PIK3CA:ENST00000263967.3:exon8:c.G1252A:p.E418K	ID=COSV55880477;OCCURENCE=13(breast),3(large_intestine),2(urinary_tract),2(cervix),7(endometrium),1(NS),1(thyroid),2(upper_aerodigestive_tract)	.	PIK3CA;c.1252G>A;p.E418K;TCGA-UY-A78P-01A-12D-A364-08	0.35	2280	1483	797	No
	chr3	179234297	179234297	A	T	exonic	PIK3CA	nonsynonymous SNV	PIK3CA:ENST00000263967.3:exon21:c.A3140T:p.H1047L	ID=COSV55873401;OCCURENCE=5(biliary_tract),1(vulva),1(gastrointestinal_tract_(site_indeterminate)),1(cervix),2(kidney),284(breast),2(pancreas),25(soft_tissue),4(stomach),78(large_intestine),4(liver),18(urinary_tract),2(salivary_gland),7(central_nervous_system),12(haematopoietic_and_lymphoid_tissue),3(prostate),8(thyroid),6(skin),15(upper_aerodigestive_tract),13(ovary),1(bone),8(oesophagus),44(end…	PIK3CA;c.3140A>T;p.H1047L;TCGA-A8-A095-01A-11W-A019-09	PIK3CA;c.3140A>T;p.H1047L;TCGA-UY-A78M-01A-21D-A34U-08	0.344	3438	2256	1182	No
007MS	chr3	179234297	179234297	A	G	exonic	PIK3CA	nonsynonymous SNV	PIK3CA:ENST00000263967.3:exon21:c.A3140G:p.H1047R	ID=COSV55873195;OCCURENCE=54(lung),216(endometrium),2(pituitary),14(bone),144(ovary),2(penis),22(oesophagus),5(meninges),17(NS),57(central_nervous_system),5(small_intestine),6(haematopoietic_and_lymphoid_tissue),1(placenta),28(salivary_gland),12(skin),32(thyroid),83(upper_aerodigestive_tract),27(prostate),1(testis),1(parathyroid),14(pancreas),63(soft_tissue),2194(breast),9(kidney),497(large_intes…	PIK3CA;c.3140A>G;p.H1047R;TCGA-AO-A0J5-01A-11W-A050-09	PIK3CA;c.3140A>G;p.H1047R;TCGA-N6-A4VD-01A-11D-A28R-08	0.312	174	120	54	Yes
009MS	chr17	7674894	7674894	G	A	exonic	TP53	stopgain	TP53:ENST00000504290.5:exon2:c.C241T:p.R81X,TP53:ENST00000504937.5:exon2:c.C241T:p.R81X,TP53:ENST00000510385.5:exon2:c.C241T:p.R81X,TP53:ENST00000610623.4:exon2:c.C160T:p.R54X,TP53:ENST00000618944.4:exon2:c.C160T:p.R54X,TP53:ENST00000619186.4:exon2:c.C160T:p.R54X,TP53:ENST00000359597.8:exon5:c.C637T:p.R213X,TP53:ENST00000413465.6:exon5:c.C637T:p.R213X,TP53:ENST00000610292.4:exon5:c.C520T:p.R174X,…	ID=COSV52665560;OCCURENCE=13(biliary_tract),1(pleura),3(gastrointestinal_tract_(site_indeterminate)),1(cervix),31(pancreas),9(soft_tissue),7(kidney),99(breast),1(peritoneum),153(large_intestine),18(urinary_tract),9(liver),38(stomach),2(small_intestine),22(central_nervous_system),24(haematopoietic_and_lymphoid_tissue),4(salivary_gland),64(skin),8(thyroid),1(adrenal_gland),43(upper_aerodigestive_tr…	TP53;c.637C>T;p.R213*;TCGA-AO-A124-01A-11D-A10M-09	TP53;c.637C>T;p.R213*;TCGA-ND-A4WC-01A-21D-A28R-08	0.452	290	159	131	Yes
010MS	chr3	179234297	179234297	A	G	exonic	PIK3CA	nonsynonymous SNV	PIK3CA:ENST00000263967.3:exon21:c.A3140G:p.H1047R	ID=COSV55873195;OCCURENCE=54(lung),216(endometrium),2(pituitary),14(bone),144(ovary),2(penis),22(oesophagus),5(meninges),17(NS),57(central_nervous_system),5(small_intestine),6(haematopoietic_and_lymphoid_tissue),1(placenta),28(salivary_gland),12(skin),32(thyroid),83(upper_aerodigestive_tract),27(prostate),1(testis),1(parathyroid),14(pancreas),63(soft_tissue),2194(breast),9(kidney),497(large_intes…	PIK3CA;c.3140A>G;p.H1047R;TCGA-AO-A0J5-01A-11W-A050-09	PIK3CA;c.3140A>G;p.H1047R;TCGA-N6-A4VD-01A-11D-A28R-08	0.15	358	305	53	No
014MS	chr3	179234297	179234297	A	G	exonic	PIK3CA	nonsynonymous SNV	PIK3CA:ENST00000263967.3:exon21:c.A3140G:p.H1047R	ID=COSV55873195;OCCURENCE=54(lung),216(endometrium),2(pituitary),14(bone),144(ovary),2(penis),22(oesophagus),5(meninges),17(NS),57(central_nervous_system),5(small_intestine),6(haematopoietic_and_lymphoid_tissue),1(placenta),28(salivary_gland),12(skin),32(thyroid),83(upper_aerodigestive_tract),27(prostate),1(testis),1(parathyroid),14(pancreas),63(soft_tissue),2194(breast),9(kidney),497(large_intes…	PIK3CA;c.3140A>G;p.H1047R;TCGA-AO-A0J5-01A-11W-A050-09	PIK3CA;c.3140A>G;p.H1047R;TCGA-N6-A4VD-01A-11D-A28R-08	0.259	450	334	116	No
015MS	chr10	8069470	8069471	CA	-	splicing	GATA3	.	.	ID=COSV60515023;OCCURENCE=63(breast)	GATA3;c.922-3_922-2delCA;p.X308_splice;TCGA-A8-A083-01A-21W-A019-09	GATA3;c.922-3_922-2delCA;p.X308_splice;TCGA-A8-A083-01A-21W-A019-09	0.224	731	569	162	No
	chr17	7675235	7675235	T	C	exonic	TP53	nonsynonymous SNV	TP53:ENST00000359597.8:exon4:c.A377G:p.Y126C,TP53:ENST00000413465.6:exon4:c.A377G:p.Y126C,TP53:ENST00000610292.4:exon4:c.A260G:p.Y87C,TP53:ENST00000269305.8:exon5:c.A377G:p.Y126C,TP53:ENST00000420246.6:exon5:c.A377G:p.Y126C,TP53:ENST00000445888.6:exon5:c.A377G:p.Y126C,TP53:ENST00000455263.6:exon5:c.A377G:p.Y126C,TP53:ENST00000610538.4:exon5:c.A260G:p.Y87C,TP53:ENST00000615910.4:exon5:c.A344G:p.Y1…	ID=COSV52689293;OCCURENCE=2(prostate),2(upper_aerodigestive_tract),2(salivary_gland),1(central_nervous_system),1(small_intestine),4(haematopoietic_and_lymphoid_tissue),1(ovary),1(oesophagus),2(endometrium),3(lung),3(stomach),6(large_intestine),5(breast),3(pancreas)	TP53;c.377A>G;p.Y126C;TCGA-BH-A1EY-01A-11D-A13L-09	TP53;c.377A>G;p.Y126C;TCGA-85-8287-01A-11D-2293-08	0.582	261	109	152	No
016MS	chr17	7674220	7674220	C	A	exonic	TP53	nonsynonymous SNV	TP53:ENST00000504290.5:exon3:c.G347T:p.R116L,TP53:ENST00000504937.5:exon3:c.G347T:p.R116L,TP53:ENST00000510385.5:exon3:c.G347T:p.R116L,TP53:ENST00000610623.4:exon3:c.G266T:p.R89L,TP53:ENST00000618944.4:exon3:c.G266T:p.R89L,TP53:ENST00000619186.4:exon3:c.G266T:p.R89L,TP53:ENST00000359597.8:exon6:c.G743T:p.R248L,TP53:ENST00000413465.6:exon6:c.G743T:p.R248L,TP53:ENST00000610292.4:exon6:c.G626T:p.R20…	ID=COSV52675468;OCCURENCE=74(lung),2(ovary),4(oesophagus),5(skin),1(thyroid),14(upper_aerodigestive_tract),2(prostate),1(genital_tract),5(haematopoietic_and_lymphoid_tissue),1(central_nervous_system),8(large_intestine),3(urinary_tract),4(liver),2(stomach),2(pancreas),3(kidney),7(breast),5(biliary_tract),1(thymus)	.	TP53;c.743G>T;p.R248L;TCGA-78-7149-01A-11D-2036-08	0.379	1256	780	476	Yes
	chr18	51058182	51058182	C	G	exonic	SMAD4	stopgain	SMAD4:ENST00000342988.7:exon6:c.C725G:p.S242X,SMAD4:ENST00000398417.6:exon6:c.C725G:p.S242X	ID=COSV61688361;OCCURENCE=1(large_intestine),1(stomach),1(upper_aerodigestive_tract),1(lung)	.	SMAD4;c.725C>G;p.S242*;TCGA-05-5715-01A-01D-1625-08	0.237	1047	799	248	Yes
	chr3	179234297	179234297	A	T	exonic	PIK3CA	nonsynonymous SNV	PIK3CA:ENST00000263967.3:exon21:c.A3140T:p.H1047L	ID=COSV55873401;OCCURENCE=5(biliary_tract),1(vulva),1(gastrointestinal_tract_(site_indeterminate)),1(cervix),2(kidney),284(breast),2(pancreas),25(soft_tissue),4(stomach),78(large_intestine),4(liver),18(urinary_tract),2(salivary_gland),7(central_nervous_system),12(haematopoietic_and_lymphoid_tissue),3(prostate),8(thyroid),6(skin),15(upper_aerodigestive_tract),13(ovary),1(bone),8(oesophagus),44(end…	PIK3CA;c.3140A>T;p.H1047L;TCGA-A8-A095-01A-11W-A019-09	PIK3CA;c.3140A>T;p.H1047L;TCGA-UY-A78M-01A-21D-A34U-08	0.351	1508	979	529	Yes
017MS	chr3	179234297	179234297	A	G	exonic	PIK3CA	nonsynonymous SNV	PIK3CA:ENST00000263967.3:exon21:c.A3140G:p.H1047R	ID=COSV55873195;OCCURENCE=54(lung),216(endometrium),2(pituitary),14(bone),144(ovary),2(penis),22(oesophagus),5(meninges),17(NS),57(central_nervous_system),5(small_intestine),6(haematopoietic_and_lymphoid_tissue),1(placenta),28(salivary_gland),12(skin),32(thyroid),83(upper_aerodigestive_tract),27(prostate),1(testis),1(parathyroid),14(pancreas),63(soft_tissue),2194(breast),9(kidney),497(large_intes…	PIK3CA;c.3140A>G;p.H1047R;TCGA-AO-A0J5-01A-11W-A050-09	PIK3CA;c.3140A>G;p.H1047R;TCGA-N6-A4VD-01A-11D-A28R-08	0.273	408	297	111	No
021MS	chr17	7675238	7675238	T	C	exonic;splicing	TP53	nonsynonymous SNV	TP53:ENST00000615910.4:exon5:c.A341G:p.K114R	ID=COSV52689235;OCCURENCE=3(pancreas),11(breast),3(liver),2(large_intestine),3(stomach),8(lung),1(endometrium),2(oesophagus),5(ovary),1(bone),3(haematopoietic_and_lymphoid_tissue),1(central_nervous_system),1(thyroid),2(genital_tract),1(prostate)	TP53;c.376-2A>G;p.X126_splice;TCGA-AN-A0XN-01A-21D-A10G-09	TP53;c.376-2A>G;p.X126_splice;TCGA-86-8075-01A-11D-2238-08	0.334	417	278	139	Yes
022MS	chrX	45063557	45063557	C	T	exonic	KDM6A	stopgain	KDM6A:ENST00000536777.5:exon15:c.C1456T:p.Q486X,KDM6A:ENST00000543216.5:exon15:c.C1510T:p.Q504X,KDM6A:ENST00000377967.8:exon16:c.C1663T:p.Q555X,KDM6A:ENST00000382899.8:exon16:c.C1612T:p.Q538X,KDM6A:ENST00000611820.4:exon17:c.C1747T:p.Q583X	ID=COSV65037942;OCCURENCE=20(urinary_tract)	.	KDM6A;c.1663C>T;p.Q555*;TCGA-GV-A3QF-01A-31D-A22Z-08	0.125	3509	3070	439	No
023MS	chr17	7675088	7675088	C	T	exonic	TP53	nonsynonymous SNV	TP53:ENST00000504290.5:exon1:c.G128A:p.R43H,TP53:ENST00000504937.5:exon1:c.G128A:p.R43H,TP53:ENST00000510385.5:exon1:c.G128A:p.R43H,TP53:ENST00000610623.4:exon1:c.G47A:p.R16H,TP53:ENST00000618944.4:exon1:c.G47A:p.R16H,TP53:ENST00000619186.4:exon1:c.G47A:p.R16H,TP53:ENST00000359597.8:exon4:c.G524A:p.R175H,TP53:ENST00000413465.6:exon4:c.G524A:p.R175H,TP53:ENST00000610292.4:exon4:c.G407A:p.R136H,TP5…	ID=COSV52661038;OCCURENCE=2(pleura),24(biliary_tract),9(vulva),1(eye),2(gastrointestinal_tract_(site_indeterminate)),5(cervix),21(kidney),181(breast),82(pancreas),14(soft_tissue),124(stomach),1(peritoneum),633(large_intestine),14(liver),40(urinary_tract),13(salivary_gland),81(haematopoietic_and_lymphoid_tissue),4(small_intestine),119(central_nervous_system),28(prostate),1(testis),6(adrenal_gland)…	TP53;c.524G>A;p.R175H;TCGA-BH-A0GY-01A-11W-A071-09	TP53;c.524G>A;p.R175H;TCGA-N5-A4RJ-01A-11D-A28R-08	0.63	1878	695	1183	No
	chr3	179218303	179218303	G	A	exonic	PIK3CA	nonsynonymous SNV	PIK3CA:ENST00000263967.3:exon10:c.G1633A:p.E545K	ID=COSV55873239;OCCURENCE=3(thymus),16(vulva),32(biliary_tract),142(cervix),8(gastrointestinal_tract_(site_indeterminate)),12(soft_tissue),14(pancreas),9(kidney),984(breast),1(vagina),219(urinary_tract),8(liver),734(large_intestine),1(peritoneum),70(stomach),2(haematopoietic_and_lymphoid_tissue),5(small_intestine),42(central_nervous_system),21(salivary_gland),155(upper_aerodigestive_tract),30(ski…	PIK3CA;c.1633G>A;p.E545K;TCGA-D8-A1XY-01A-11D-A14K-09	PIK3CA;c.1633G>A;p.E545K;TCGA-N7-A4Y8-01A-11D-A28R-08	0.393	1106	672	434	No
030MS	chr10	8069470	8069471	CA	-	splicing	GATA3	.	.	ID=COSV60515023;OCCURENCE=63(breast)	GATA3;c.922-3_922-2delCA;p.X308_splice;TCGA-A8-A083-01A-21W-A019-09	GATA3;c.922-3_922-2delCA;p.X308_splice;TCGA-A8-A083-01A-21W-A019-09	0.387	2064	1273	791	No
	chr3	179218303	179218303	G	A	exonic	PIK3CA	nonsynonymous SNV	PIK3CA:ENST00000263967.3:exon10:c.G1633A:p.E545K	ID=COSV55873239;OCCURENCE=3(thymus),16(vulva),32(biliary_tract),142(cervix),8(gastrointestinal_tract_(site_indeterminate)),12(soft_tissue),14(pancreas),9(kidney),984(breast),1(vagina),219(urinary_tract),8(liver),734(large_intestine),1(peritoneum),70(stomach),2(haematopoietic_and_lymphoid_tissue),5(small_intestine),42(central_nervous_system),21(salivary_gland),155(upper_aerodigestive_tract),30(ski…	PIK3CA;c.1633G>A;p.E545K;TCGA-D8-A1XY-01A-11D-A14K-09	PIK3CA;c.1633G>A;p.E545K;TCGA-N7-A4Y8-01A-11D-A28R-08	0.77	1056	242	814	No
031MS	chr3	179218303	179218303	G	A	exonic	PIK3CA	nonsynonymous SNV	PIK3CA:ENST00000263967.3:exon10:c.G1633A:p.E545K	ID=COSV55873239;OCCURENCE=3(thymus),16(vulva),32(biliary_tract),142(cervix),8(gastrointestinal_tract_(site_indeterminate)),12(soft_tissue),14(pancreas),9(kidney),984(breast),1(vagina),219(urinary_tract),8(liver),734(large_intestine),1(peritoneum),70(stomach),2(haematopoietic_and_lymphoid_tissue),5(small_intestine),42(central_nervous_system),21(salivary_gland),155(upper_aerodigestive_tract),30(ski…	PIK3CA;c.1633G>A;p.E545K;TCGA-D8-A1XY-01A-11D-A14K-09	PIK3CA;c.1633G>A;p.E545K;TCGA-N7-A4Y8-01A-11D-A28R-08	0.157	2041	1721	320	No
032MS	chr3	179199690	179199690	G	A	exonic	PIK3CA	nonsynonymous SNV	PIK3CA:ENST00000263967.3:exon3:c.G353A:p.G118D	ID=COSV55877290;OCCURENCE=26(endometrium),3(lung),1(ovary),13(central_nervous_system),1(salivary_gland),1(thyroid),2(upper_aerodigestive_tract),1(prostate),2(pancreas),2(kidney),32(breast),14(large_intestine),2(urinary_tract),3(stomach),1(cervix)	PIK3CA;c.353G>A;p.G118D;TCGA-LL-A9Q3-01A-11D-A41F-09	PIK3CA;c.353G>A;p.G118D;TCGA-ZF-AA4N-01A-11D-A38G-08	0.069	559	521	38	No
	chr3	179230348	179230348	G	A	exonic	PIK3CA	nonsynonymous SNV	PIK3CA:ENST00000263967.3:exon20:c.G2908A:p.E970K	ID=COSV55875690;OCCURENCE=1(cervix),2(urinary_tract),5(large_intestine),1(kidney),10(breast),1(upper_aerodigestive_tract),1(haematopoietic_and_lymphoid_tissue),1(endometrium)	.	PIK3CA;c.2908G>A;p.E970K;TCGA-AA-3984-01A-02D-1981-10	0.147	679	580	99	No
	chr3	179234297	179234297	A	G	exonic	PIK3CA	nonsynonymous SNV	PIK3CA:ENST00000263967.3:exon21:c.A3140G:p.H1047R	ID=COSV55873195;OCCURENCE=54(lung),216(endometrium),2(pituitary),14(bone),144(ovary),2(penis),22(oesophagus),5(meninges),17(NS),57(central_nervous_system),5(small_intestine),6(haematopoietic_and_lymphoid_tissue),1(placenta),28(salivary_gland),12(skin),32(thyroid),83(upper_aerodigestive_tract),27(prostate),1(testis),1(parathyroid),14(pancreas),63(soft_tissue),2194(breast),9(kidney),497(large_intes…	PIK3CA;c.3140A>G;p.H1047R;TCGA-AO-A0J5-01A-11W-A050-09	PIK3CA;c.3140A>G;p.H1047R;TCGA-N6-A4VD-01A-11D-A28R-08	0.114	1648	1411	188	No
	chr3	179234297	179234297	A	T	exonic	PIK3CA	nonsynonymous SNV	PIK3CA:ENST00000263967.3:exon21:c.A3140T:p.H1047L	ID=COSV55873401;OCCURENCE=5(biliary_tract),1(vulva),1(gastrointestinal_tract_(site_indeterminate)),1(cervix),2(kidney),284(breast),2(pancreas),25(soft_tissue),4(stomach),78(large_intestine),4(liver),18(urinary_tract),2(salivary_gland),7(central_nervous_system),12(haematopoietic_and_lymphoid_tissue),3(prostate),8(thyroid),6(skin),15(upper_aerodigestive_tract),13(ovary),1(bone),8(oesophagus),44(end…	PIK3CA;c.3140A>T;p.H1047L;TCGA-A8-A095-01A-11W-A019-09	PIK3CA;c.3140A>T;p.H1047L;TCGA-UY-A78M-01A-21D-A34U-08	0.030	1648	1411	188	No
033MS	chr17	7675109	7675109	T	A	exonic	TP53	nonsynonymous SNV	TP53:ENST00000504290.5:exon1:c.A107T:p.H36L,TP53:ENST00000504937.5:exon1:c.A107T:p.H36L,TP53:ENST00000510385.5:exon1:c.A107T:p.H36L,TP53:ENST00000610623.4:exon1:c.A26T:p.H9L,TP53:ENST00000618944.4:exon1:c.A26T:p.H9L,TP53:ENST00000619186.4:exon1:c.A26T:p.H9L,TP53:ENST00000359597.8:exon4:c.A503T:p.H168L,TP53:ENST00000413465.6:exon4:c.A503T:p.H168L,TP53:ENST00000610292.4:exon4:c.A386T:p.H129L,TP53:E…	ID=COSV52682212;OCCURENCE=1(upper_aerodigestive_tract),1(bone),1(oesophagus),4(lung),3(large_intestine),2(liver),3(breast)	.	TP53;c.503A>T;p.H168L;TCGA-44-6775-01A-31D-A27T-08	0.376	442	276	166	Yes
035MS	chr3	179218303	179218303	G	A	exonic	PIK3CA	nonsynonymous SNV	PIK3CA:ENST00000263967.3:exon10:c.G1633A:p.E545K	ID=COSV55873239;OCCURENCE=3(thymus),16(vulva),32(biliary_tract),142(cervix),8(gastrointestinal_tract_(site_indeterminate)),12(soft_tissue),14(pancreas),9(kidney),984(breast),1(vagina),219(urinary_tract),8(liver),734(large_intestine),1(peritoneum),70(stomach),2(haematopoietic_and_lymphoid_tissue),5(small_intestine),42(central_nervous_system),21(salivary_gland),155(upper_aerodigestive_tract),30(ski…	PIK3CA;c.1633G>A;p.E545K;TCGA-D8-A1XY-01A-11D-A14K-09	PIK3CA;c.1633G>A;p.E545K;TCGA-N7-A4Y8-01A-11D-A28R-08	0.348	527	344	183	No
036MS	chr17	31232863	31232863	G	-	exonic	NF1	frameshift deletion	NF1:ENST00000356175.7:exon26:c.3478delG:p.G1160Vfs*6,NF1:ENST00000358273.8:exon26:c.3478delG:p.G1160Vfs*6	.	.	NF1;c.3479delG;p.G1160Vfs*6;TCGA-17-Z015-01A-01W-0746-08	0.055	179	170	9	No
	chr3	179234297	179234297	A	T	exonic	PIK3CA	nonsynonymous SNV	PIK3CA:ENST00000263967.3:exon21:c.A3140T:p.H1047L	ID=COSV55873401;OCCURENCE=5(biliary_tract),1(vulva),1(gastrointestinal_tract_(site_indeterminate)),1(cervix),2(kidney),284(breast),2(pancreas),25(soft_tissue),4(stomach),78(large_intestine),4(liver),18(urinary_tract),2(salivary_gland),7(central_nervous_system),12(haematopoietic_and_lymphoid_tissue),3(prostate),8(thyroid),6(skin),15(upper_aerodigestive_tract),13(ovary),1(bone),8(oesophagus),44(end…	PIK3CA;c.3140A>T;p.H1047L;TCGA-A8-A095-01A-11W-A019-09	PIK3CA;c.3140A>T;p.H1047L;TCGA-UY-A78M-01A-21D-A34U-08	0.315	125	86	39	No
039MS	chr14	104780214	104780214	C	T	exonic	AKT1	nonsynonymous SNV	AKT1:ENST00000554581.5:exon2:c.G49A:p.E17K,AKT1:ENST00000402615.6:exon3:c.G49A:p.E17K,AKT1:ENST00000407796.6:exon3:c.G49A:p.E17K,AKT1:ENST00000554848.5:exon3:c.G49A:p.E17K,AKT1:ENST00000555528.5:exon3:c.G49A:p.E17K,AKT1:ENST00000349310.7:exon4:c.G49A:p.E17K	ID=COSV62571334;OCCURENCE=22(prostate),11(upper_aerodigestive_tract),58(skin),27(thyroid),5(salivary_gland),7(haematopoietic_and_lymphoid_tissue),2(central_nervous_system),6(NS),70(meninges),15(bone),9(ovary),49(lung),35(endometrium),8(cervix),1(thymus),3(biliary_tract),3(stomach),23(urinary_tract),2(peritoneum),50(large_intestine),1(kidney),372(breast),18(soft_tissue),6(pancreas)	AKT1;c.49G>A;p.E17K;TCGA-E2-A15I-01A-21D-A135-09	AKT1;c.49G>A;p.E17K;TCGA-A6-5661-01A-01D-1650-10	0.337	1677	1112	565	No
	chr17	16039637	16039637	C	A	exonic	NCOR1	nonsynonymous SNV	NCOR1:ENST00000395857.7:exon42:c.G6463T:p.G2155C,NCOR1:ENST00000395851.5:exon43:c.G6442T:p.G2148C,NCOR1:ENST00000268712.7:exon44:c.G6751T:p.G2251C	ID=COSV99251141;OCCURENCE=1(upper_aerodigestive_tract)	.	NCOR1;c.6751G>T;p.G2251C;TCGA-QK-A6VB-01A-12D-A34J-08	0.103	1824	1637	187	No
040MS	chr3	179204536	179204536	G	A	exonic	PIK3CA	nonsynonymous SNV	PIK3CA:ENST00000263967.3:exon6:c.G1093A:p.E365K	ID=COSV55881636;OCCURENCE=2(stomach),4(large_intestine),4(urinary_tract),4(breast),1(biliary_tract),1(ovary),1(lung),9(endometrium),1(skin),1(central_nervous_system)	.	PIK3CA;c.1093G>A;p.E365K;TCGA-A6-A566-01A-11D-A28G-10	0.217	824	646	178	No
	chr3	179218294	179218294	G	A	exonic	PIK3CA	nonsynonymous SNV	PIK3CA:ENST00000263967.3:exon10:c.G1624A:p.E542K	ID=COSV55873227;OCCURENCE=49(stomach),116(urinary_tract),12(liver),470(large_intestine),14(kidney),622(breast),16(soft_tissue),8(pancreas),66(cervix),6(gastrointestinal_tract_(site_indeterminate)),1(thymus),6(vulva),13(biliary_tract),4(NS),31(oesophagus),1(bone),45(ovary),8(penis),74(lung),81(endometrium),1(pituitary),2(genital_tract),3(testis),10(prostate),78(upper_aerodigestive_tract),35(skin),…	PIK3CA;c.1624G>A;p.E542K;TCGA-HN-A2OB-01A-21D-A27P-09	PIK3CA;c.1624G>A;p.E542K;TCGA-AA-3812-01A-01W-0900-09	0.4	571	343	228	No
044MS	chr12	25245350	25245350	C	G	exonic	KRAS	nonsynonymous SNV	KRAS:ENST00000256078.8:exon2:c.G35C:p.G12A,KRAS:ENST00000311936.7:exon2:c.G35C:p.G12A,KRAS:ENST00000556131.1:exon2:c.G35C:p.G12A,KRAS:ENST00000557334.5:exon2:c.G35C:p.G12A	ID=COSV55497479;OCCURENCE=5(cervix),6(gastrointestinal_tract_(site_indeterminate)),2(thymus),47(biliary_tract),27(stomach),10(urinary_tract),1(liver),1(peritoneum),1485(large_intestine),9(breast),5(soft_tissue),90(pancreas),2(genital_tract),5(testis),2(prostate),3(upper_aerodigestive_tract),3(skin),7(thyroid),8(central_nervous_system),18(small_intestine),77(haematopoietic_and_lymphoid_tissue),4(N…	.	KRAS;c.35G>C;p.G12A;TCGA-N8-A4PL-01A-11D-A28R-08	0.293	2840	2007	833	Yes
	chr17	7674944	7674944	C	G	exonic	TP53	nonsynonymous SNV	TP53:ENST00000504290.5:exon2:c.G191C:p.R64P,TP53:ENST00000504937.5:exon2:c.G191C:p.R64P,TP53:ENST00000510385.5:exon2:c.G191C:p.R64P,TP53:ENST00000610623.4:exon2:c.G110C:p.R37P,TP53:ENST00000618944.4:exon2:c.G110C:p.R37P,TP53:ENST00000619186.4:exon2:c.G110C:p.R37P,TP53:ENST00000359597.8:exon5:c.G587C:p.R196P,TP53:ENST00000413465.6:exon5:c.G587C:p.R196P,TP53:ENST00000610292.4:exon5:c.G470C:p.R157P,…	ID=COSV52678297;OCCURENCE=2(pancreas),3(breast),2(urinary_tract),4(large_intestine),1(stomach),1(biliary_tract),12(lung),2(oesophagus),2(central_nervous_system),2(haematopoietic_and_lymphoid_tissue),1(salivary_gland),4(upper_aerodigestive_tract)	.	TP53;c.587G>C;p.R196P;TCGA-P3-A6T5-01A-11D-A34J-08	0.512	2790	1361	1429	Yes
045MS	chr14	104780214	104780214	C	T	exonic	AKT1	nonsynonymous SNV	AKT1:ENST00000554581.5:exon2:c.G49A:p.E17K,AKT1:ENST00000402615.6:exon3:c.G49A:p.E17K,AKT1:ENST00000407796.6:exon3:c.G49A:p.E17K,AKT1:ENST00000554848.5:exon3:c.G49A:p.E17K,AKT1:ENST00000555528.5:exon3:c.G49A:p.E17K,AKT1:ENST00000349310.7:exon4:c.G49A:p.E17K	ID=COSV62571334;OCCURENCE=22(prostate),11(upper_aerodigestive_tract),58(skin),27(thyroid),5(salivary_gland),7(haematopoietic_and_lymphoid_tissue),2(central_nervous_system),6(NS),70(meninges),15(bone),9(ovary),49(lung),35(endometrium),8(cervix),1(thymus),3(biliary_tract),3(stomach),23(urinary_tract),2(peritoneum),50(large_intestine),1(kidney),372(breast),18(soft_tissue),6(pancreas)	AKT1;c.49G>A;p.E17K;TCGA-E2-A15I-01A-21D-A135-09	AKT1;c.49G>A;p.E17K;TCGA-A6-5661-01A-01D-1650-10	0.069	1000	932	68	No
047MS	chr3	179234297	179234297	A	G	exonic	PIK3CA	nonsynonymous SNV	PIK3CA:ENST00000263967.3:exon21:c.A3140G:p.H1047R	ID=COSV55873195;OCCURENCE=54(lung),216(endometrium),2(pituitary),14(bone),144(ovary),2(penis),22(oesophagus),5(meninges),17(NS),57(central_nervous_system),5(small_intestine),6(haematopoietic_and_lymphoid_tissue),1(placenta),28(salivary_gland),12(skin),32(thyroid),83(upper_aerodigestive_tract),27(prostate),1(testis),1(parathyroid),14(pancreas),63(soft_tissue),2194(breast),9(kidney),497(large_intes…	PIK3CA;c.3140A>G;p.H1047R;TCGA-AO-A0J5-01A-11W-A050-09	PIK3CA;c.3140A>G;p.H1047R;TCGA-N6-A4VD-01A-11D-A28R-08	0.072	1025	952	73	No
052MS	chr3	179218307	179218307	A	G	exonic	PIK3CA	nonsynonymous SNV	PIK3CA:ENST00000263967.3:exon10:c.A1637G:p.Q546R	ID=COSV55876869;OCCURENCE=22(endometrium),10(ovary),1(NS),4(central_nervous_system),1(small_intestine),2(salivary_gland),5(upper_aerodigestive_tract),1(skin),1(thyroid),1(prostate),1(pancreas),32(breast),1(urinary_tract),29(large_intestine),4(stomach),1(biliary_tract),3(cervix),1(gastrointestinal_tract_(site_indeterminate))	PIK3CA;c.1637A>G;p.Q546R;TCGA-GM-A2DH-01A-11D-A17W-09	PIK3CA;c.1637A>G;p.Q546R;TCGA-N7-A4Y5-01A-12D-A28R-08	0.198	956	767	189	No
	chr3	179234230	179234230	A	G	exonic	PIK3CA	nonsynonymous SNV	PIK3CA:ENST00000263967.3:exon21:c.A3073G:p.T1025A	ID=COSV55873252;OCCURENCE=1(soft_tissue),7(breast),10(large_intestine),4(stomach),1(central_nervous_system),1(thyroid),1(prostate),1(pituitary),25(endometrium),2(ovary)	PIK3CA;c.3073A>G;p.T1025A;TCGA-EW-A1PE-01A-11D-A142-09	PIK3CA;c.3073A>G;p.T1025A;TCGA-CK-4951-01A-01D-1408-10	0.216	2839	2225	614	No
056MS	chr3	179218294	179218294	G	A	exonic	PIK3CA	nonsynonymous SNV	PIK3CA:ENST00000263967.3:exon10:c.G1624A:p.E542K	ID=COSV55873227;OCCURENCE=49(stomach),116(urinary_tract),12(liver),470(large_intestine),14(kidney),622(breast),16(soft_tissue),8(pancreas),66(cervix),6(gastrointestinal_tract_(site_indeterminate)),1(thymus),6(vulva),13(biliary_tract),4(NS),31(oesophagus),1(bone),45(ovary),8(penis),74(lung),81(endometrium),1(pituitary),2(genital_tract),3(testis),10(prostate),78(upper_aerodigestive_tract),35(skin),…	PIK3CA;c.1624G>A;p.E542K;TCGA-HN-A2OB-01A-21D-A27P-09	PIK3CA;c.1624G>A;p.E542K;TCGA-AA-3812-01A-01W-0900-09	0.179	366	301	65	No
057MS	chr3	179218303	179218303	G	A	exonic	PIK3CA	nonsynonymous SNV	PIK3CA:ENST00000263967.3:exon10:c.G1633A:p.E545K	ID=COSV55873239;OCCURENCE=3(thymus),16(vulva),32(biliary_tract),142(cervix),8(gastrointestinal_tract_(site_indeterminate)),12(soft_tissue),14(pancreas),9(kidney),984(breast),1(vagina),219(urinary_tract),8(liver),734(large_intestine),1(peritoneum),70(stomach),2(haematopoietic_and_lymphoid_tissue),5(small_intestine),42(central_nervous_system),21(salivary_gland),155(upper_aerodigestive_tract),30(ski…	PIK3CA;c.1633G>A;p.E545K;TCGA-D8-A1XY-01A-11D-A14K-09	PIK3CA;c.1633G>A;p.E545K;TCGA-N7-A4Y8-01A-11D-A28R-08	0.321	989	672	317	No
060MS	chr5	56859894	56859895	AA	-	exonic	MAP3K1	frameshift deletion	MAP3K1:ENST00000399503.3:exon3:c.813_814del:p.R273Sfs*27	.	.	MAP3K1;c.816_817delAA;p.R273Sfs*27;TCGA-B5-A0JZ-01A-11W-A062-09	0.116	853	755	98	No
064MS	chr3	179203765	179203765	T	A	exonic	PIK3CA	nonsynonymous SNV	PIK3CA:ENST00000263967.3:exon5:c.T1035A:p.N345K	ID=COSV55873276;OCCURENCE=2(skin),2(upper_aerodigestive_tract),4(prostate),5(central_nervous_system),2(salivary_gland),1(NS),5(lung),11(endometrium),4(ovary),4(oesophagus),1(biliary_tract),18(large_intestine),5(urinary_tract),9(stomach),2(soft_tissue),202(breast)	PIK3CA;c.1035T>A;p.N345K;TCGA-AO-A03L-01A-41W-A071-09	PIK3CA;c.1035T>A;p.N345K;TCGA-AA-3837-01A-01W-0900-09	0.349	1423	926	497	No
065MS	chr10	8069470	8069471	CA	-	splicing	GATA3	.	.	ID=COSV60515023;OCCURENCE=63(breast)	GATA3;c.922-3_922-2delCA;p.X308_splice;TCGA-A8-A083-01A-21W-A019-09	GATA3;c.922-3_922-2delCA;p.X308_splice;TCGA-A8-A083-01A-21W-A019-09	0.233	2214	1701	513	No
	chr3	179234297	179234297	A	G	exonic	PIK3CA	nonsynonymous SNV	PIK3CA:ENST00000263967.3:exon21:c.A3140G:p.H1047R	ID=COSV55873195;OCCURENCE=54(lung),216(endometrium),2(pituitary),14(bone),144(ovary),2(penis),22(oesophagus),5(meninges),17(NS),57(central_nervous_system),5(small_intestine),6(haematopoietic_and_lymphoid_tissue),1(placenta),28(salivary_gland),12(skin),32(thyroid),83(upper_aerodigestive_tract),27(prostate),1(testis),1(parathyroid),14(pancreas),63(soft_tissue),2194(breast),9(kidney),497(large_intes…	PIK3CA;c.3140A>G;p.H1047R;TCGA-AO-A0J5-01A-11W-A050-09	PIK3CA;c.3140A>G;p.H1047R;TCGA-N6-A4VD-01A-11D-A28R-08	0.259	3067	2273	794	No
066MS	chr17	39724008	39724008	G	T	exonic	ERBB2	nonsynonymous SNV	ERBB2:ENST00000445658.6:exon13:c.G1477T:p.D493Y,ERBB2:ENST00000269571.9:exon19:c.G2305T:p.D769Y,ERBB2:ENST00000406381.6:exon19:c.G2215T:p.D739Y,ERBB2:ENST00000541774.5:exon19:c.G2260T:p.D754Y,ERBB2:ENST00000584450.5:exon19:c.G2305T:p.D769Y,ERBB2:ENST00000584601.5:exon23:c.G2215T:p.D739Y	ID=COSV54062373;OCCURENCE=30(breast),2(urinary_tract),2(large_intestine),2(stomach),1(biliary_tract),4(oesophagus),1(salivary_gland)	ERBB2;c.2305G>T;p.D769Y;TCGA-BH-A1FE-01A-11D-A13L-09	ERBB2;c.2305G>T;p.D769Y;TCGA-MV-A51V-01A-11D-A26M-08	0.234	352	270	82	No
	chr3	179218294	179218294	G	A	exonic	PIK3CA	nonsynonymous SNV	PIK3CA:ENST00000263967.3:exon10:c.G1624A:p.E542K	ID=COSV55873227;OCCURENCE=49(stomach),116(urinary_tract),12(liver),470(large_intestine),14(kidney),622(breast),16(soft_tissue),8(pancreas),66(cervix),6(gastrointestinal_tract_(site_indeterminate)),1(thymus),6(vulva),13(biliary_tract),4(NS),31(oesophagus),1(bone),45(ovary),8(penis),74(lung),81(endometrium),1(pituitary),2(genital_tract),3(testis),10(prostate),78(upper_aerodigestive_tract),35(skin),…	PIK3CA;c.1624G>A;p.E542K;TCGA-HN-A2OB-01A-21D-A27P-09	PIK3CA;c.1624G>A;p.E542K;TCGA-AA-3812-01A-01W-0900-09	0.275	263	191	72	No
067MS	chr17	7673778	7673778	T	G	exonic	TP53	nonsynonymous SNV	TP53:ENST00000504290.5:exon4:c.A446C:p.D149A,TP53:ENST00000504937.5:exon4:c.A446C:p.D149A,TP53:ENST00000510385.5:exon4:c.A446C:p.D149A,TP53:ENST00000610623.4:exon4:c.A365C:p.D122A,TP53:ENST00000618944.4:exon4:c.A365C:p.D122A,TP53:ENST00000619186.4:exon4:c.A365C:p.D122A,TP53:ENST00000359597.8:exon7:c.A842C:p.D281A,TP53:ENST00000610292.4:exon7:c.A725C:p.D242A,TP53:ENST00000269305.8:exon8:c.A842C:p.…	ID=COSV52729448;OCCURENCE=1(upper_aerodigestive_tract),2(central_nervous_system)	.	TP53;c.842A>C;p.D281A;TCGA-06-0195-01B-01D-1491-08	0.518	1489	717	772	Yes
	chr3	179234302	179234302	G	C	exonic	PIK3CA	nonsynonymous SNV	PIK3CA:ENST00000263967.3:exon21:c.G3145C:p.G1049R	ID=COSV55874453;OCCURENCE=2(urinary_tract),16(large_intestine),1(stomach),1(soft_tissue),2(pancreas),1(kidney),39(breast),1(cervix),11(endometrium),3(lung),2(ovary),3(upper_aerodigestive_tract),3(thyroid),1(skin),4(central_nervous_system),1(salivary_gland)	PIK3CA;c.3145G>C;p.G1049R;TCGA-BH-A2L8-01A-11D-A18P-09	PIK3CA;c.3145G>C;p.G1049R;TCGA-ZF-A9RE-01A-11D-A38G-08	0.862	3820	526	3294	Yes
079MS	chr17	7674221	7674221	G	A	exonic	TP53	nonsynonymous SNV	TP53:ENST00000504290.5:exon3:c.C346T:p.R116W,TP53:ENST00000504937.5:exon3:c.C346T:p.R116W,TP53:ENST00000510385.5:exon3:c.C346T:p.R116W,TP53:ENST00000610623.4:exon3:c.C265T:p.R89W,TP53:ENST00000618944.4:exon3:c.C265T:p.R89W,TP53:ENST00000619186.4:exon3:c.C265T:p.R89W,TP53:ENST00000359597.8:exon6:c.C742T:p.R248W,TP53:ENST00000413465.6:exon6:c.C742T:p.R248W,TP53:ENST00000610292.4:exon6:c.C625T:p.R20…	ID=COSV52662035;OCCURENCE=58(ovary),2(bone),1(penis),65(oesophagus),54(lung),31(endometrium),11(NS),2(salivary_gland),63(central_nervous_system),70(haematopoietic_and_lymphoid_tissue),17(prostate),2(genital_tract),55(skin),8(thyroid),53(upper_aerodigestive_tract),115(breast),14(kidney),44(pancreas),11(soft_tissue),52(stomach),246(large_intestine),28(urinary_tract),5(liver),2(pleura),4(vulva),16(b…	TP53;c.742C>T;p.R248W;TCGA-C8-A12P-01A-11D-A10Y-09	TP53;c.742C>T;p.R248W;TCGA-N8-A4PP-01A-11D-A28R-08	0.091	1400	1274	126	No
	chr3	179218307	179218307	A	G	exonic	PIK3CA	nonsynonymous SNV	PIK3CA:ENST00000263967.3:exon10:c.A1637G:p.Q546R	ID=COSV55876869;OCCURENCE=22(endometrium),10(ovary),1(NS),4(central_nervous_system),1(small_intestine),2(salivary_gland),5(upper_aerodigestive_tract),1(skin),1(thyroid),1(prostate),1(pancreas),32(breast),1(urinary_tract),29(large_intestine),4(stomach),1(biliary_tract),3(cervix),1(gastrointestinal_tract_(site_indeterminate))	PIK3CA;c.1637A>G;p.Q546R;TCGA-GM-A2DH-01A-11D-A17W-09	PIK3CA;c.1637A>G;p.Q546R;TCGA-N7-A4Y5-01A-12D-A28R-08	0.119	293	259	34	No
080MS	chr3	179218303	179218303	G	A	exonic	PIK3CA	nonsynonymous SNV	PIK3CA:ENST00000263967.3:exon10:c.G1633A:p.E545K	ID=COSV55873239;OCCURENCE=3(thymus),16(vulva),32(biliary_tract),142(cervix),8(gastrointestinal_tract_(site_indeterminate)),12(soft_tissue),14(pancreas),9(kidney),984(breast),1(vagina),219(urinary_tract),8(liver),734(large_intestine),1(peritoneum),70(stomach),2(haematopoietic_and_lymphoid_tissue),5(small_intestine),42(central_nervous_system),21(salivary_gland),155(upper_aerodigestive_tract),30(ski…	PIK3CA;c.1633G>A;p.E545K;TCGA-D8-A1XY-01A-11D-A14K-09	PIK3CA;c.1633G>A;p.E545K;TCGA-N7-A4Y8-01A-11D-A28R-08	0.264	490	361	129	No
081MS	chr10	87933165	87933165	T	C	exonic	PTEN	nonsynonymous SNV	PTEN:ENST00000371953.7:exon5:c.T406C:p.C136R	ID=COSV64289087;OCCURENCE=5(breast),1(kidney),2(lung),9(endometrium),1(prostate),2(skin),1(upper_aerodigestive_tract),6(central_nervous_system)	.	PTEN;c.406T>C;p.C136R;TCGA-UF-A7JF-01A-11D-A34J-08	0.54	1537	707	830	Yes
	chr17	7674220	7674220	C	T	exonic	TP53	nonsynonymous SNV	TP53:ENST00000504290.5:exon3:c.G347A:p.R116Q,TP53:ENST00000504937.5:exon3:c.G347A:p.R116Q,TP53:ENST00000510385.5:exon3:c.G347A:p.R116Q,TP53:ENST00000610623.4:exon3:c.G266A:p.R89Q,TP53:ENST00000618944.4:exon3:c.G266A:p.R89Q,TP53:ENST00000619186.4:exon3:c.G266A:p.R89Q,TP53:ENST00000359597.8:exon6:c.G743A:p.R248Q,TP53:ENST00000413465.6:exon6:c.G743A:p.R248Q,TP53:ENST00000610292.4:exon6:c.G626A:p.R20…	ID=COSV52661580;OCCURENCE=51(prostate),1(genital_tract),1(testis),2(adrenal_gland),18(thyroid),27(skin),74(upper_aerodigestive_tract),3(salivary_gland),73(central_nervous_system),11(small_intestine),133(haematopoietic_and_lymphoid_tissue),8(NS),1(meninges),3(penis),66(ovary),8(bone),73(oesophagus),47(endometrium),1(pituitary),55(lung),1(eye),3(gastrointestinal_tract_(site_indeterminate)),4(cervix…	TP53;c.743G>A;p.R248Q;TCGA-B6-A0I1-01A-11D-A21Q-09	TP53;c.743G>A;p.R248Q;TCGA-NA-A4QW-01A-11D-A28R-08	0.529	1791	844	947	Yes
093MS	chr3	179218304	179218304	A	G	exonic	PIK3CA	nonsynonymous SNV	PIK3CA:ENST00000263967.3:exon10:c.A1634G:p.E545G	ID=COSV55873220;OCCURENCE=9(stomach),1(NS),79(large_intestine),5(liver),10(urinary_tract),1(penis),4(ovary),31(breast),1(pituitary),18(endometrium),4(lung),1(eye),2(prostate),10(skin),1(cervix),5(upper_aerodigestive_tract),7(central_nervous_system),2(haematopoietic_and_lymphoid_tissue)	PIK3CA;c.1634A>G;p.E545G;TCGA-AC-A5XS-01A-11D-A29N-09	PIK3CA;c.1634A>G;p.E545G;TCGA-4Z-AA7Y-01A-11D-A391-08	0.291	600	426	174	No
095MS	chr3	179234297	179234297	A	T	exonic	PIK3CA	nonsynonymous SNV	PIK3CA:ENST00000263967.3:exon21:c.A3140T:p.H1047L	ID=COSV55873401;OCCURENCE=5(biliary_tract),1(vulva),1(gastrointestinal_tract_(site_indeterminate)),1(cervix),2(kidney),284(breast),2(pancreas),25(soft_tissue),4(stomach),78(large_intestine),4(liver),18(urinary_tract),2(salivary_gland),7(central_nervous_system),12(haematopoietic_and_lymphoid_tissue),3(prostate),8(thyroid),6(skin),15(upper_aerodigestive_tract),13(ovary),1(bone),8(oesophagus),44(end…	PIK3CA;c.3140A>T;p.H1047L;TCGA-A8-A095-01A-11W-A019-09	PIK3CA;c.3140A>T;p.H1047L;TCGA-UY-A78M-01A-21D-A34U-08	0.52	1737	833	904	No
099MS	chr3	179234297	179234297	A	T	exonic	PIK3CA	nonsynonymous SNV	PIK3CA:ENST00000263967.3:exon21:c.A3140T:p.H1047L	ID=COSV55873401;OCCURENCE=5(biliary_tract),1(vulva),1(gastrointestinal_tract_(site_indeterminate)),1(cervix),2(kidney),284(breast),2(pancreas),25(soft_tissue),4(stomach),78(large_intestine),4(liver),18(urinary_tract),2(salivary_gland),7(central_nervous_system),12(haematopoietic_and_lymphoid_tissue),3(prostate),8(thyroid),6(skin),15(upper_aerodigestive_tract),13(ovary),1(bone),8(oesophagus),44(end…	PIK3CA;c.3140A>T;p.H1047L;TCGA-A8-A095-01A-11W-A019-09	PIK3CA;c.3140A>T;p.H1047L;TCGA-UY-A78M-01A-21D-A34U-08	0.286	271	194	77	No
101MS	chr2	197402110	197402110	T	C	exonic	SF3B1	nonsynonymous SNV	SF3B1:ENST00000335508.10:exon15:c.A2098G:p.K700E	ID=COSV59205318;OCCURENCE=2(central_nervous_system),524(haematopoietic_and_lymphoid_tissue),1(salivary_gland),1(skin),7(prostate),3(lung),1(oesophagus),17(NS),5(biliary_tract),1(eye),16(pancreas),1(soft_tissue),82(breast),2(kidney),1(large_intestine)	SF3B1;c.2098A>G;p.K700E;TCGA-B6-A0WT-01A-11D-A10G-09	SF3B1;c.2098A>G;p.K700E;TCGA-AB-2929-03A-01W-0732-08	0.209	1551	1227	324	No
104MS	chr17	7674248	7674248	T	C	exonic	TP53	nonsynonymous SNV	TP53:ENST00000504290.5:exon3:c.A319G:p.N107D,TP53:ENST00000504937.5:exon3:c.A319G:p.N107D,TP53:ENST00000510385.5:exon3:c.A319G:p.N107D,TP53:ENST00000610623.4:exon3:c.A238G:p.N80D,TP53:ENST00000618944.4:exon3:c.A238G:p.N80D,TP53:ENST00000619186.4:exon3:c.A238G:p.N80D,TP53:ENST00000359597.8:exon6:c.A715G:p.N239D,TP53:ENST00000413465.6:exon6:c.A715G:p.N239D,TP53:ENST00000610292.4:exon6:c.A598G:p.N20…	ID=COSV52664075;OCCURENCE=16(haematopoietic_and_lymphoid_tissue),2(biliary_tract),2(central_nervous_system),1(salivary_gland),1(thyroid),5(upper_aerodigestive_tract),5(prostate),11(lung),1(pancreas),2(endometrium),12(ovary),2(kidney),3(oesophagus),12(breast),1(peritoneum),6(large_intestine),2(urinary_tract),1(liver),1(fallopian_tube),2(stomach)	.	TP53;c.715A>G;p.N239D;TCGA-J2-A4AD-01A-11D-A24D-08	0.222	862	671	191	No
107MS	chr10	8069470	8069471	CA	-	splicing	GATA3	.	.	ID=COSV60515023;OCCURENCE=63(breast)	GATA3;c.922-3_922-2delCA;p.X308_splice;TCGA-A8-A083-01A-21W-A019-09	GATA3;c.922-3_922-2delCA;p.X308_splice;TCGA-A8-A083-01A-21W-A019-09	0.401	869	518	351	No

## Sheet: Table S3 
Table S3. Mutations identified in tumour and plasma samples. It is indicated whether the variants were detected using an established caller or manually. VAF, variant allele frequency; DP, sequencing depth; REF_AD, reads for the reference allele; MUT_AD, reads for the mutated allele.
	Sample	Chr	Start	End	Ref	Alt	Func.ensGene	Gene.ensGene	ExonicFunc.ensGene	AAChange.ensGene	cosmic95	tcgaBC	tcgaALL	VAF	DP	REF_AD	MUT_AD
Caller detected	007MS	chr3	179234297	179234297	A	G	exonic	PIK3CA	nonsynonymous SNV	PIK3CA:ENST00000263967.3:exon21:c.A3140G:p.H1047R	ID=COSV55873195;OCCURENCE=54(lung),216(endometrium),2(pituitary),14(bone),144(ovary),2(penis),22(oesophagus),5(meninges),17(NS),57(central_nervous_system),5(small_intestine),6(haematopoietic_and_lymphoid_tissue),1(placenta),28(salivary_gland),12(skin),32(thyroid),83(upper_aerodigestive_tract),27(prostate),1(testis),1(parathyroid),14(pancreas),63(soft_tissue),2194(breast),9(kidney),497(large_intes…	PIK3CA;c.3140A>G;p.H1047R;TCGA-AO-A0J5-01A-11W-A050-09	PIK3CA;c.3140A>G;p.H1047R;TCGA-N6-A4VD-01A-11D-A28R-08	0.004	1958	1950	8
	009MS	chr17	7674894	7674894	G	A	exonic	TP53	stopgain	TP53:ENST00000504290.5:exon2:c.C241T:p.R81X,TP53:ENST00000504937.5:exon2:c.C241T:p.R81X,TP53:ENST00000510385.5:exon2:c.C241T:p.R81X,TP53:ENST00000610623.4:exon2:c.C160T:p.R54X,TP53:ENST00000618944.4:exon2:c.C160T:p.R54X,TP53:ENST00000619186.4:exon2:c.C160T:p.R54X,TP53:ENST00000359597.8:exon5:c.C637T:p.R213X,TP53:ENST00000413465.6:exon5:c.C637T:p.R213X,TP53:ENST00000610292.4:exon5:c.C520T:p.R174X,…	ID=COSV52665560;OCCURENCE=13(biliary_tract),1(pleura),3(gastrointestinal_tract_(site_indeterminate)),1(cervix),31(pancreas),9(soft_tissue),7(kidney),99(breast),1(peritoneum),153(large_intestine),18(urinary_tract),9(liver),38(stomach),2(small_intestine),22(central_nervous_system),24(haematopoietic_and_lymphoid_tissue),4(salivary_gland),64(skin),8(thyroid),1(adrenal_gland),43(upper_aerodigestive_tr…	TP53;c.637C>T;p.R213*;TCGA-AO-A124-01A-11D-A10M-09	TP53;c.637C>T;p.R213*;TCGA-ND-A4WC-01A-21D-A28R-08	0.009	1661	1647	14
	016MS	chr3	179234297	179234297	A	T	exonic	PIK3CA	nonsynonymous SNV	PIK3CA:ENST00000263967.3:exon21:c.A3140T:p.H1047L	ID=COSV55873401;OCCURENCE=5(biliary_tract),1(vulva),1(gastrointestinal_tract_(site_indeterminate)),1(cervix),2(kidney),284(breast),2(pancreas),25(soft_tissue),4(stomach),78(large_intestine),4(liver),18(urinary_tract),2(salivary_gland),7(central_nervous_system),12(haematopoietic_and_lymphoid_tissue),3(prostate),8(thyroid),6(skin),15(upper_aerodigestive_tract),13(ovary),1(bone),8(oesophagus),44(end…	PIK3CA;c.3140A>T;p.H1047L;TCGA-A8-A095-01A-11W-A019-09	PIK3CA;c.3140A>T;p.H1047L;TCGA-UY-A78M-01A-21D-A34U-08	0.046	1326	1266	60
		chr17	7674220	7674220	C	A	exonic	TP53	nonsynonymous SNV	TP53:ENST00000504290.5:exon3:c.G347T:p.R116L,TP53:ENST00000504937.5:exon3:c.G347T:p.R116L,TP53:ENST00000510385.5:exon3:c.G347T:p.R116L,TP53:ENST00000610623.4:exon3:c.G266T:p.R89L,TP53:ENST00000618944.4:exon3:c.G266T:p.R89L,TP53:ENST00000619186.4:exon3:c.G266T:p.R89L,TP53:ENST00000359597.8:exon6:c.G743T:p.R248L,TP53:ENST00000413465.6:exon6:c.G743T:p.R248L,TP53:ENST00000610292.4:exon6:c.G626T:p.R20…	ID=COSV52675468;OCCURENCE=74(lung),2(ovary),4(oesophagus),5(skin),1(thyroid),14(upper_aerodigestive_tract),2(prostate),1(genital_tract),5(haematopoietic_and_lymphoid_tissue),1(central_nervous_system),8(large_intestine),3(urinary_tract),4(liver),2(stomach),2(pancreas),3(kidney),7(breast),5(biliary_tract),1(thymus)	.	TP53;c.743G>T;p.R248L;TCGA-78-7149-01A-11D-2036-08	0.032	2133	2066	67
		chr18	51058182	51058182	C	G	exonic	SMAD4	stopgain	SMAD4:ENST00000342988.7:exon6:c.C725G:p.S242X,SMAD4:ENST00000398417.6:exon6:c.C725G:p.S242X	ID=COSV61688361;OCCURENCE=1(large_intestine),1(stomach),1(upper_aerodigestive_tract),1(lung)	.	SMAD4;c.725C>G;p.S242*;TCGA-05-5715-01A-01D-1625-08	0.029	1685	1637	48
	021MS	chr17	7675238	7675238	T	C	exonic	TP53	nonsynonymous SNV	TP53:ENST00000615910.4:exon5:c.A341G:p.K114R	ID=COSV52689235;OCCURENCE=3(pancreas),11(breast),3(liver),2(large_intestine),3(stomach),8(lung),1(endometrium),2(oesophagus),5(ovary),1(bone),3(haematopoietic_and_lymphoid_tissue),1(central_nervous_system),1(thyroid),2(genital_tract),1(prostate)	TP53;c.376-2A>G;p.X126_splice;TCGA-AN-A0XN-01A-21D-A10G-09	TP53;c.376-2A>G;p.X126_splice;TCGA-86-8075-01A-11D-2238-08	0.018	2676	2628	48
	033MS	chr17	7675109	7675109	T	A	exonic	TP53	nonsynonymous SNV	TP53:ENST00000504290.5:exon1:c.A107T:p.H36L,TP53:ENST00000504937.5:exon1:c.A107T:p.H36L,TP53:ENST00000510385.5:exon1:c.A107T:p.H36L,TP53:ENST00000610623.4:exon1:c.A26T:p.H9L,TP53:ENST00000618944.4:exon1:c.A26T:p.H9L,TP53:ENST00000619186.4:exon1:c.A26T:p.H9L,TP53:ENST00000359597.8:exon4:c.A503T:p.H168L,TP53:ENST00000413465.6:exon4:c.A503T:p.H168L,TP53:ENST00000610292.4:exon4:c.A386T:p.H129L,TP53:E…	ID=COSV52682212;OCCURENCE=1(upper_aerodigestive_tract),1(bone),1(oesophagus),4(lung),3(large_intestine),2(liver),3(breast)	.	TP53;c.503A>T;p.H168L;TCGA-44-6775-01A-31D-A27T-08	0.003	3952	3938	14
	044MS	chr17	7674944	7674944	C	G	exonic	TP53	nonsynonymous SNV	TP53:ENST00000504290.5:exon2:c.G191C:p.R64P,TP53:ENST00000504937.5:exon2:c.G191C:p.R64P,TP53:ENST00000510385.5:exon2:c.G191C:p.R64P,TP53:ENST00000610623.4:exon2:c.G110C:p.R37P,TP53:ENST00000618944.4:exon2:c.G110C:p.R37P,TP53:ENST00000619186.4:exon2:c.G110C:p.R37P,TP53:ENST00000359597.8:exon5:c.G587C:p.R196P,TP53:ENST00000413465.6:exon5:c.G587C:p.R196P,TP53:ENST00000610292.4:exon5:c.G470C:p.R157P,…	ID=COSV52678297;OCCURENCE=2(pancreas),3(breast),2(urinary_tract),4(large_intestine),1(stomach),1(biliary_tract),12(lung),2(oesophagus),2(central_nervous_system),2(haematopoietic_and_lymphoid_tissue),1(salivary_gland),4(upper_aerodigestive_tract)	.	TP53;c.587G>C;p.R196P;TCGA-P3-A6T5-01A-11D-A34J-08	0.012	2580	2543	31
		chr12	25245350	25245350	C	G	exonic	KRAS	nonsynonymous SNV	KRAS:ENST00000256078.8:exon2:c.G35C:p.G12A,KRAS:ENST00000311936.7:exon2:c.G35C:p.G12A,KRAS:ENST00000556131.1:exon2:c.G35C:p.G12A,KRAS:ENST00000557334.5:exon2:c.G35C:p.G12A	ID=COSV55497479;OCCURENCE=5(cervix),6(gastrointestinal_tract_(site_indeterminate)),2(thymus),47(biliary_tract),27(stomach),10(urinary_tract),1(liver),1(peritoneum),1485(large_intestine),9(breast),5(soft_tissue),90(pancreas),2(genital_tract),5(testis),2(prostate),3(upper_aerodigestive_tract),3(skin),7(thyroid),8(central_nervous_system),18(small_intestine),77(haematopoietic_and_lymphoid_tissue),4(N…	.	KRAS;c.35G>C;p.G12A;TCGA-N8-A4PL-01A-11D-A28R-08	0.009	1731	1715	16
	067MS	chr3	179234302	179234302	G	C	exonic	PIK3CA	nonsynonymous SNV	PIK3CA:ENST00000263967.3:exon21:c.G3145C:p.G1049R	ID=COSV55874453;OCCURENCE=2(urinary_tract),16(large_intestine),1(stomach),1(soft_tissue),2(pancreas),1(kidney),39(breast),1(cervix),11(endometrium),3(lung),2(ovary),3(upper_aerodigestive_tract),3(thyroid),1(skin),4(central_nervous_system),1(salivary_gland)	PIK3CA;c.3145G>C;p.G1049R;TCGA-BH-A2L8-01A-11D-A18P-09	PIK3CA;c.3145G>C;p.G1049R;TCGA-ZF-A9RE-01A-11D-A38G-08	0.003	2398	2391	7
		chr17	7673778	7673778	T	G	exonic	TP53	nonsynonymous SNV	TP53:ENST00000504290.5:exon4:c.A446C:p.D149A,TP53:ENST00000504937.5:exon4:c.A446C:p.D149A,TP53:ENST00000510385.5:exon4:c.A446C:p.D149A,TP53:ENST00000610623.4:exon4:c.A365C:p.D122A,TP53:ENST00000618944.4:exon4:c.A365C:p.D122A,TP53:ENST00000619186.4:exon4:c.A365C:p.D122A,TP53:ENST00000359597.8:exon7:c.A842C:p.D281A,TP53:ENST00000610292.4:exon7:c.A725C:p.D242A,TP53:ENST00000269305.8:exon8:c.A842C:p.…	ID=COSV52729448;OCCURENCE=1(upper_aerodigestive_tract),2(central_nervous_system)	.	TP53;c.842A>C;p.D281A;TCGA-06-0195-01B-01D-1491-08	0.003	2200	2194	6
	081MS	chr17	7674220	7674220	C	T	exonic	TP53	nonsynonymous SNV	TP53:ENST00000504290.5:exon3:c.G347A:p.R116Q,TP53:ENST00000504937.5:exon3:c.G347A:p.R116Q,TP53:ENST00000510385.5:exon3:c.G347A:p.R116Q,TP53:ENST00000610623.4:exon3:c.G266A:p.R89Q,TP53:ENST00000618944.4:exon3:c.G266A:p.R89Q,TP53:ENST00000619186.4:exon3:c.G266A:p.R89Q,TP53:ENST00000359597.8:exon6:c.G743A:p.R248Q,TP53:ENST00000413465.6:exon6:c.G743A:p.R248Q,TP53:ENST00000610292.4:exon6:c.G626A:p.R20…	ID=COSV52661580;OCCURENCE=51(prostate),1(genital_tract),1(testis),2(adrenal_gland),18(thyroid),27(skin),74(upper_aerodigestive_tract),3(salivary_gland),73(central_nervous_system),11(small_intestine),133(haematopoietic_and_lymphoid_tissue),8(NS),1(meninges),3(penis),66(ovary),8(bone),73(oesophagus),47(endometrium),1(pituitary),55(lung),1(eye),3(gastrointestinal_tract_(site_indeterminate)),4(cervix…	TP53;c.743G>A;p.R248Q;TCGA-B6-A0I1-01A-11D-A21Q-09	TP53;c.743G>A;p.R248Q;TCGA-NA-A4QW-01A-11D-A28R-08	0.015	2560	2522	38
		chr10	87933165	87933165	T	C	exonic	PTEN	nonsynonymous SNV	PTEN:ENST00000371953.7:exon5:c.T406C:p.C136R	ID=COSV64289087;OCCURENCE=5(breast),1(kidney),2(lung),9(endometrium),1(prostate),2(skin),1(upper_aerodigestive_tract),6(central_nervous_system)	.	PTEN;c.406T>C;p.C136R;TCGA-UF-A7JF-01A-11D-A34J-08	0.033	2093	2024	69
Manually detected	002MS	chr17	7675088	7675088	C	T	exonic	TP53	nonsynonymous SNV	TP53:ENST00000504290.5:exon1:c.G128A:p.R43H,TP53:ENST00000504937.5:exon1:c.G128A:p.R43H,TP53:ENST00000510385.5:exon1:c.G128A:p.R43H,TP53:ENST00000610623.4:exon1:c.G47A:p.R16H,TP53:ENST00000618944.4:exon1:c.G47A:p.R16H,TP53:ENST00000619186.4:exon1:c.G47A:p.R16H,TP53:ENST00000359597.8:exon4:c.G524A:p.R175H,TP53:ENST00000413465.6:exon4:c.G524A:p.R175H,TP53:ENST00000610292.4:exon4:c.G407A:p.R136H,TP5…	ID=COSV52661038;OCCURENCE=2(pleura),24(biliary_tract),9(vulva),1(eye),2(gastrointestinal_tract_(site_indeterminate)),5(cervix),21(kidney),181(breast),82(pancreas),14(soft_tissue),124(stomach),1(peritoneum),633(large_intestine),14(liver),40(urinary_tract),13(salivary_gland),81(haematopoietic_and_lymphoid_tissue),4(small_intestine),119(central_nervous_system),28(prostate),1(testis),6(adrenal_gland)…	TP53;c.524G>A;p.R175H;TCGA-BH-A0GY-01A-11W-A071-09	TP53;c.524G>A;p.R175H;TCGA-N5-A4RJ-01A-11D-A28R-08	0.002	37957	37810	79
	015MS	chr10	8069470	8069471	CA	-	exonic	GATA3	Deletion	.	ID=COSV60515023;OCCURENCE=63(breast)	GATA3;c.922-3_922-2delCA;p.X308_splice;TCGA-A8-A083-01A-21W-A019-09	GATA3;c.922-3_922-2delCA;p.X308_splice;TCGA-A8-A083-01A-21W-A019-09	0.0008	54419	51935	48
		chr17	7675235	7675235	T	C	exonic	TP53	nonsynonymous SNV	TP53:ENST00000359597.8:exon4:c.A377G:p.Y126C,TP53:ENST00000413465.6:exon4:c.A377G:p.Y126C,TP53:ENST00000610292.4:exon4:c.A260G:p.Y87C,TP53:ENST00000269305.8:exon5:c.A377G:p.Y126C,TP53:ENST00000420246.6:exon5:c.A377G:p.Y126C,TP53:ENST00000445888.6:exon5:c.A377G:p.Y126C,TP53:ENST00000455263.6:exon5:c.A377G:p.Y126C,TP53:ENST00000610538.4:exon5:c.A260G:p.Y87C,TP53:ENST00000615910.4:exon5:c.A344G:p.Y1…	ID=COSV52689293;OCCURENCE=2(prostate),2(upper_aerodigestive_tract),2(salivary_gland),1(central_nervous_system),1(small_intestine),4(haematopoietic_and_lymphoid_tissue),1(ovary),1(oesophagus),2(endometrium),3(lung),3(stomach),6(large_intestine),5(breast),3(pancreas)	TP53;c.377A>G;p.Y126C;TCGA-BH-A1EY-01A-11D-A13L-09	TP53;c.377A>G;p.Y126C;TCGA-85-8287-01A-11D-2293-08	0.002	26965	26854	65
	079MS	chr17	7674221	7674221	G	A	exonic	TP53	nonsynonymous SNV	TP53:ENST00000504290.5:exon3:c.C346T:p.R116W,TP53:ENST00000504937.5:exon3:c.C346T:p.R116W,TP53:ENST00000510385.5:exon3:c.C346T:p.R116W,TP53:ENST00000610623.4:exon3:c.C265T:p.R89W,TP53:ENST00000618944.4:exon3:c.C265T:p.R89W,TP53:ENST00000619186.4:exon3:c.C265T:p.R89W,TP53:ENST00000359597.8:exon6:c.C742T:p.R248W,TP53:ENST00000413465.6:exon6:c.C742T:p.R248W,TP53:ENST00000610292.4:exon6:c.C625T:p.R20…	ID=COSV52662035;OCCURENCE=58(ovary),2(bone),1(penis),65(oesophagus),54(lung),31(endometrium),11(NS),2(salivary_gland),63(central_nervous_system),70(haematopoietic_and_lymphoid_tissue),17(prostate),2(genital_tract),55(skin),8(thyroid),53(upper_aerodigestive_tract),115(breast),14(kidney),44(pancreas),11(soft_tissue),52(stomach),246(large_intestine),28(urinary_tract),5(liver),2(pleura),4(vulva),16(b…	TP53;c.742C>T;p.R248W;TCGA-C8-A12P-01A-11D-A10Y-09	TP53;c.742C>T;p.R248W;TCGA-N8-A4PP-01A-11D-A28R-08	0.0005	67119	67014	35
	107MS	chr10	8069470	8069471	CA	-	exonic	GATA3	Deletion	.	ID=COSV60515023;OCCURENCE=63(breast)	GATA3;c.922-3_922-2delCA;p.X308_splice;TCGA-A8-A083-01A-21W-A019-09	GATA3;c.922-3_922-2delCA;p.X308_splice;TCGA-A8-A083-01A-21W-A019-09	0.0003	23874	22762	8

## Sheet: Table S4
Table S4. Manual inspection of aligned sequencing data from plasma samples. Tumour variants not detected in plasma samples are shown, indicating whether they were found in the manual inspection and were statistically significative in the Fisher test. Those variants with statistical significance are marked in bold.
Sample	Chr	Start	End	Ref	Alt	Gene.ensGene	AAChange.ensGene	cosmic95	tcgaBC	tcgaALL	In ctDNA caller	Manually in ctDNA	VAF	DP	REF_AD	MUT_AD	Allele counts in sample	Allele counts in 22 controls and non-mutated samples	p.value Fisher test (Allele counts in sample VS Allele counts in 22 controls and non-mutated samples)	Allele counts in 22 controls	p.value Fisher test (Allele counts in sample VS Allele counts in 22 controls)
001MS	chr3	179234302	179234302	G	C	PIK3CA	PIK3CA:ENST00000263967.3:exon21:c.G3145C:p.G1049R	ID=COSV55874453;OCCURENCE=2(urinary_tract),16(large_intestine),1(stomach),1(soft_tissue),2(pancreas),1(kidney),39(breast),1(cervix),11(endometrium),3(lung),2(ovary),3(upper_aerodigestive_tract),3(thyroid),1(skin),4(central_nervous_system),1(salivary_gland)	PIK3CA;c.3145G>C;p.G1049R;TCGA-BH-A2L8-01A-11D-A18P-09	PIK3CA;c.3145G>C;p.G1049R;TCGA-ZF-A9RE-01A-11D-A38G-08	No	Yes	0.000382	31395	31361	12	C: 12; G: 31361	C: 643; G: 2233575	0.202	C: 109; G: 493726	0.058
002MS	chr16	68828254	68828254	C	T	CDH1	CDH1:ENST00000422392.6:exon13:c.C2062T:p.R688W,CDH1:ENST00000261769.9:exon14:c.C2245T:p.R749W,CDH1:ENST00000611625.4:exon15:c.C2308T:p.R770W	ID=COSV99931786;OCCURENCE=1(stomach)	.	CDH1;c.2245C>T;p.R749W;TCGA-BR-8686-01A-11D-2394-08	No	Yes	0.000647	27799	27725	18	T: 18; C: 27725	T: 1713; C: 3129528	0.267	T: 619; C: 1063293	0.357
	chr17	7675088	7675088	C	T	TP53	TP53:ENST00000504290.5:exon1:c.G128A:p.R43H,TP53:ENST00000504937.5:exon1:c.G128A:p.R43H,TP53:ENST00000510385.5:exon1:c.G128A:p.R43H,TP53:ENST00000610623.4:exon1:c.G47A:p.R16H,TP53:ENST00000618944.4:exon1:c.G47A:p.R16H,TP53:ENST00000619186.4:exon1:c.G47A:p.R16H,TP53:ENST00000359597.8:exon4:c.G524A:p.R175H,TP53:ENST00000413465.6:exon4:c.G524A:p.R175H,TP53:ENST00000610292.4:exon4:c.G407A:p.R136H,TP5…	ID=COSV52661038;OCCURENCE=2(pleura),24(biliary_tract),9(vulva),1(eye),2(gastrointestinal_tract_(site_indeterminate)),5(cervix),21(kidney),181(breast),82(pancreas),14(soft_tissue),124(stomach),1(peritoneum),633(large_intestine),14(liver),40(urinary_tract),13(salivary_gland),81(haematopoietic_and_lymphoid_tissue),4(small_intestine),119(central_nervous_system),28(prostate),1(testis),6(adrenal_gland)…	TP53;c.524G>A;p.R175H;TCGA-BH-A0GY-01A-11W-A071-09	TP53;c.524G>A;p.R175H;TCGA-N5-A4RJ-01A-11D-A28R-08	No	Yes	0.00208	37957	37810	79	T: 79; C: 37810	T: 4977; C: 3804484	0.0000736	T: 1886; C: 1403012	0.000191
	chr3	179210186	179210186	G	A	PIK3CA	PIK3CA:ENST00000263967.3:exon8:c.G1252A:p.E418K	ID=COSV55880477;OCCURENCE=13(breast),3(large_intestine),2(urinary_tract),2(cervix),7(endometrium),1(NS),1(thyroid),2(upper_aerodigestive_tract)	.	PIK3CA;c.1252G>A;p.E418K;TCGA-UY-A78P-01A-12D-A364-08	No	Yes	0.00385	18170	18043	70	A: 70; G: 18043	A: 5791; G: 1653089	0.214	A: 1999; G: 353291	0.999
	chr3	179234297	179234297	A	T	PIK3CA	PIK3CA:ENST00000263967.3:exon21:c.A3140T:p.H1047L	ID=COSV55873401;OCCURENCE=5(biliary_tract),1(vulva),1(gastrointestinal_tract_(site_indeterminate)),1(cervix),2(kidney),284(breast),2(pancreas),25(soft_tissue),4(stomach),78(large_intestine),4(liver),18(urinary_tract),2(salivary_gland),7(central_nervous_system),12(haematopoietic_and_lymphoid_tissue),3(prostate),8(thyroid),6(skin),15(upper_aerodigestive_tract),13(ovary),1(bone),8(oesophagus),44(end…	PIK3CA;c.3140A>T;p.H1047L;TCGA-A8-A095-01A-11W-A019-09	PIK3CA;c.3140A>T;p.H1047L;TCGA-UY-A78M-01A-21D-A34U-08	No	Yes	0.000286	27883	27873	8	T: 8; A: 27873	T: 2673: A: 2205416	0.999	T: 351; A: 506433	0.998
010MS	chr3	179234297	179234297	A	G	PIK3CA	PIK3CA:ENST00000263967.3:exon21:c.A3140G:p.H1047R	ID=COSV55873195;OCCURENCE=54(lung),216(endometrium),2(pituitary),14(bone),144(ovary),2(penis),22(oesophagus),5(meninges),17(NS),57(central_nervous_system),5(small_intestine),6(haematopoietic_and_lymphoid_tissue),1(placenta),28(salivary_gland),12(skin),32(thyroid),83(upper_aerodigestive_tract),27(prostate),1(testis),1(parathyroid),14(pancreas),63(soft_tissue),2194(breast),9(kidney),497(large_intes…	PIK3CA;c.3140A>G;p.H1047R;TCGA-AO-A0J5-01A-11W-A050-09	PIK3CA;c.3140A>G;p.H1047R;TCGA-N6-A4VD-01A-11D-A28R-08	No	No	-	-	-	-	-	-	-	-	-
014MS	chr3	179234297	179234297	A	G	PIK3CA	PIK3CA:ENST00000263967.3:exon21:c.A3140G:p.H1047R	ID=COSV55873195;OCCURENCE=54(lung),216(endometrium),2(pituitary),14(bone),144(ovary),2(penis),22(oesophagus),5(meninges),17(NS),57(central_nervous_system),5(small_intestine),6(haematopoietic_and_lymphoid_tissue),1(placenta),28(salivary_gland),12(skin),32(thyroid),83(upper_aerodigestive_tract),27(prostate),1(testis),1(parathyroid),14(pancreas),63(soft_tissue),2194(breast),9(kidney),497(large_intes…	PIK3CA;c.3140A>G;p.H1047R;TCGA-AO-A0J5-01A-11W-A050-09	PIK3CA;c.3140A>G;p.H1047R;TCGA-N6-A4VD-01A-11D-A28R-08	No	No	-	-	-	-	-	-	-	-	-
015MS	chr10	8069470	8069471	CA	-	GATA3	.	ID=COSV60515023;OCCURENCE=63(breast)	GATA3;c.922-3_922-2delCA;p.X308_splice;TCGA-A8-A083-01A-21W-A019-09	GATA3;c.922-3_922-2delCA;p.X308_splice;TCGA-A8-A083-01A-21W-A019-09	No	Yes	0.000882	54419	51935	48	-2CA: 48; CA: 51935	-2CA: 0; CA: 3017268	9.430E-86	-2CA: 0; CA: 828065	1.04E-59
	chr17	7675235	7675235	T	C	TP53	TP53:ENST00000359597.8:exon4:c.A377G:p.Y126C,TP53:ENST00000413465.6:exon4:c.A377G:p.Y126C,TP53:ENST00000610292.4:exon4:c.A260G:p.Y87C,TP53:ENST00000269305.8:exon5:c.A377G:p.Y126C,TP53:ENST00000420246.6:exon5:c.A377G:p.Y126C,TP53:ENST00000445888.6:exon5:c.A377G:p.Y126C,TP53:ENST00000455263.6:exon5:c.A377G:p.Y126C,TP53:ENST00000610538.4:exon5:c.A260G:p.Y87C,TP53:ENST00000615910.4:exon5:c.A344G:p.Y1…	ID=COSV52689293;OCCURENCE=2(prostate),2(upper_aerodigestive_tract),2(salivary_gland),1(central_nervous_system),1(small_intestine),4(haematopoietic_and_lymphoid_tissue),1(ovary),1(oesophagus),2(endometrium),3(lung),3(stomach),6(large_intestine),5(breast),3(pancreas)	TP53;c.377A>G;p.Y126C;TCGA-BH-A1EY-01A-11D-A13L-09	TP53;c.377A>G;p.Y126C;TCGA-85-8287-01A-11D-2293-08	No	Yes	0.0024	26965	26854	65	C: 65; T: 26854	C: 519; T: 1924716	1.812E-37	C: 221; T: 722193	8.75E-33
017MS	chr3	179234297	179234297	A	G	PIK3CA	PIK3CA:ENST00000263967.3:exon21:c.A3140G:p.H1047R	ID=COSV55873195;OCCURENCE=54(lung),216(endometrium),2(pituitary),14(bone),144(ovary),2(penis),22(oesophagus),5(meninges),17(NS),57(central_nervous_system),5(small_intestine),6(haematopoietic_and_lymphoid_tissue),1(placenta),28(salivary_gland),12(skin),32(thyroid),83(upper_aerodigestive_tract),27(prostate),1(testis),1(parathyroid),14(pancreas),63(soft_tissue),2194(breast),9(kidney),497(large_intes…	PIK3CA;c.3140A>G;p.H1047R;TCGA-AO-A0J5-01A-11W-A050-09	PIK3CA;c.3140A>G;p.H1047R;TCGA-N6-A4VD-01A-11D-A28R-08	No	Yes	0.000164	36494	36460	6	G: 6; A: 36460	G: 487; A: 2215794	0.809	G: 187; A: 506433	0.990
022MS	chrX	45063557	45063557	C	T	KDM6A	KDM6A:ENST00000536777.5:exon15:c.C1456T:p.Q486X,KDM6A:ENST00000543216.5:exon15:c.C1510T:p.Q504X,KDM6A:ENST00000377967.8:exon16:c.C1663T:p.Q555X,KDM6A:ENST00000382899.8:exon16:c.C1612T:p.Q538X,KDM6A:ENST00000611820.4:exon17:c.C1747T:p.Q583X	ID=COSV65037942;OCCURENCE=20(urinary_tract)	.	KDM6A;c.1663C>T;p.Q555*;TCGA-GV-A3QF-01A-31D-A22Z-08	No	Yes	0.000219	54594	54521	12	T: 12; C: 54521	T: 1803; C: 6184764	0.866	T: 738; C: 2015197	0.977
023MS	chr17	7675088	7675088	C	T	TP53	TP53:ENST00000504290.5:exon1:c.G128A:p.R43H,TP53:ENST00000504937.5:exon1:c.G128A:p.R43H,TP53:ENST00000510385.5:exon1:c.G128A:p.R43H,TP53:ENST00000610623.4:exon1:c.G47A:p.R16H,TP53:ENST00000618944.4:exon1:c.G47A:p.R16H,TP53:ENST00000619186.4:exon1:c.G47A:p.R16H,TP53:ENST00000359597.8:exon4:c.G524A:p.R175H,TP53:ENST00000413465.6:exon4:c.G524A:p.R175H,TP53:ENST00000610292.4:exon4:c.G407A:p.R136H,TP5…	ID=COSV52661038;OCCURENCE=2(pleura),24(biliary_tract),9(vulva),1(eye),2(gastrointestinal_tract_(site_indeterminate)),5(cervix),21(kidney),181(breast),82(pancreas),14(soft_tissue),124(stomach),1(peritoneum),633(large_intestine),14(liver),40(urinary_tract),13(salivary_gland),81(haematopoietic_and_lymphoid_tissue),4(small_intestine),119(central_nervous_system),28(prostate),1(testis),6(adrenal_gland)…	TP53;c.524G>A;p.R175H;TCGA-BH-A0GY-01A-11W-A071-09	TP53;c.524G>A;p.R175H;TCGA-N5-A4RJ-01A-11D-A28R-08	No	Yes	0.000702	34152	34041	24	T: 24; C: 34041	T: 4977; C: 3804484	0.999	T: 1886; C: 1403012	0.999
	chr3	179218303	179218303	G	A	PIK3CA	PIK3CA:ENST00000263967.3:exon10:c.G1633A:p.E545K	ID=COSV55873239;OCCURENCE=3(thymus),16(vulva),32(biliary_tract),142(cervix),8(gastrointestinal_tract_(site_indeterminate)),12(soft_tissue),14(pancreas),9(kidney),984(breast),1(vagina),219(urinary_tract),8(liver),734(large_intestine),1(peritoneum),70(stomach),2(haematopoietic_and_lymphoid_tissue),5(small_intestine),42(central_nervous_system),21(salivary_gland),155(upper_aerodigestive_tract),30(ski…	PIK3CA;c.1633G>A;p.E545K;TCGA-D8-A1XY-01A-11D-A14K-09	PIK3CA;c.1633G>A;p.E545K;TCGA-N7-A4Y8-01A-11D-A28R-08	No	Yes	0.000377	10601	10276	4	A: 4; G: 10276	A: 474; G: 1443537;	0.437	A: 225; G: 397429	0.830
030MS	chr10	8069470	8069471	CA	-	GATA3	.	ID=COSV60515023;OCCURENCE=63(breast)	GATA3;c.922-3_922-2delCA;p.X308_splice;TCGA-A8-A083-01A-21W-A019-09	GATA3;c.922-3_922-2delCA;p.X308_splice;TCGA-A8-A083-01A-21W-A019-09	No	No	-	-	-	-	-	-	-	-	-
	chr3	179218303	179218303	G	A	PIK3CA	PIK3CA:ENST00000263967.3:exon10:c.G1633A:p.E545K	ID=COSV55873239;OCCURENCE=3(thymus),16(vulva),32(biliary_tract),142(cervix),8(gastrointestinal_tract_(site_indeterminate)),12(soft_tissue),14(pancreas),9(kidney),984(breast),1(vagina),219(urinary_tract),8(liver),734(large_intestine),1(peritoneum),70(stomach),2(haematopoietic_and_lymphoid_tissue),5(small_intestine),42(central_nervous_system),21(salivary_gland),155(upper_aerodigestive_tract),30(ski…	PIK3CA;c.1633G>A;p.E545K;TCGA-D8-A1XY-01A-11D-A14K-09	PIK3CA;c.1633G>A;p.E545K;TCGA-N7-A4Y8-01A-11D-A28R-08	No	Yes	0.00012	24337	23094	3	A: 3; G: 23094	A: 474; G: 1443537	0.980	A: 225; G: 397429	0.999
	chr3	179218303	179218303	G	A	PIK3CA	PIK3CA:ENST00000263967.3:exon10:c.G1633A:p.E545K	ID=COSV55873239;OCCURENCE=3(thymus),16(vulva),32(biliary_tract),142(cervix),8(gastrointestinal_tract_(site_indeterminate)),12(soft_tissue),14(pancreas),9(kidney),984(breast),1(vagina),219(urinary_tract),8(liver),734(large_intestine),1(peritoneum),70(stomach),2(haematopoietic_and_lymphoid_tissue),5(small_intestine),42(central_nervous_system),21(salivary_gland),155(upper_aerodigestive_tract),30(ski…	PIK3CA;c.1633G>A;p.E545K;TCGA-D8-A1XY-01A-11D-A14K-09	PIK3CA;c.1633G>A;p.E545K;TCGA-N7-A4Y8-01A-11D-A28R-08	No	Yes	0.0000720	13879	13659	1	A: 1; G: 13659	A: 474; G: 1443537	0.988	A: 225; G: 397429	0.999
032MS	chr3	179199690	179199690	G	A	PIK3CA	PIK3CA:ENST00000263967.3:exon3:c.G353A:p.G118D	ID=COSV55877290;OCCURENCE=26(endometrium),3(lung),1(ovary),13(central_nervous_system),1(salivary_gland),1(thyroid),2(upper_aerodigestive_tract),1(prostate),2(pancreas),2(kidney),32(breast),14(large_intestine),2(urinary_tract),3(stomach),1(cervix)	PIK3CA;c.353G>A;p.G118D;TCGA-LL-A9Q3-01A-11D-A41F-09	PIK3CA;c.353G>A;p.G118D;TCGA-ZF-AA4N-01A-11D-A38G-08	No	Yes	0.00205	8291	8260	17	A: 17; G: 8260	A: 2238; G: 823702	0.898	A: 650; G: 183027	0.993
	chr3	179230348	179230348	G	A	PIK3CA	PIK3CA:ENST00000263967.3:exon20:c.G2908A:p.E970K	ID=COSV55875690;OCCURENCE=1(cervix),2(urinary_tract),5(large_intestine),1(kidney),10(breast),1(upper_aerodigestive_tract),1(haematopoietic_and_lymphoid_tissue),1(endometrium)	.	PIK3CA;c.2908G>A;p.E970K;TCGA-AA-3984-01A-02D-1981-10	No	Yes	0.00010	9399	9393	1	A: 1; G: 9393	A: 369; G: 803772	0.986	A: 203; G: 187624	0.999
	chr3	179234297	179234297	A	G	PIK3CA	PIK3CA:ENST00000263967.3:exon21:c.A3140G:p.H1047R	ID=COSV55873195;OCCURENCE=54(lung),216(endometrium),2(pituitary),14(bone),144(ovary),2(penis),22(oesophagus),5(meninges),17(NS),57(central_nervous_system),5(small_intestine),6(haematopoietic_and_lymphoid_tissue),1(placenta),28(salivary_gland),12(skin),32(thyroid),83(upper_aerodigestive_tract),27(prostate),1(testis),1(parathyroid),14(pancreas),63(soft_tissue),2194(breast),9(kidney),497(large_intes…	PIK3CA;c.3140A>G;p.H1047R;TCGA-AO-A0J5-01A-11W-A050-09	PIK3CA;c.3140A>G;p.H1047R;TCGA-N6-A4VD-01A-11D-A28R-08	No	Yes	0.000168	23786	23769	4	G: 4; A: 23769	G: 487; A: 2215794	0.764	G: 187; A: 506433	0.973
	chr3	179234297	179234297	A	T	PIK3CA	PIK3CA:ENST00000263967.3:exon21:c.A3140T:p.H1047L	ID=COSV55873401;OCCURENCE=5(biliary_tract),1(vulva),1(gastrointestinal_tract_(site_indeterminate)),1(cervix),2(kidney),284(breast),2(pancreas),25(soft_tissue),4(stomach),78(large_intestine),4(liver),18(urinary_tract),2(salivary_gland),7(central_nervous_system),12(haematopoietic_and_lymphoid_tissue),3(prostate),8(thyroid),6(skin),15(upper_aerodigestive_tract),13(ovary),1(bone),8(oesophagus),44(end…	PIK3CA;c.3140A>T;p.H1047L;TCGA-A8-A095-01A-11W-A019-09	PIK3CA;c.3140A>T;p.H1047L;TCGA-UY-A78M-01A-21D-A34U-08	No	Yes	0.000420	23786	23769	10	T: 10; A: 23769	T: 2673; A: 2205416	0.999	T: 351; A: 506433	0.963
035MS	chr3	179218303	179218303	G	A	PIK3CA	PIK3CA:ENST00000263967.3:exon10:c.G1633A:p.E545K	ID=COSV55873239;OCCURENCE=3(thymus),16(vulva),32(biliary_tract),142(cervix),8(gastrointestinal_tract_(site_indeterminate)),12(soft_tissue),14(pancreas),9(kidney),984(breast),1(vagina),219(urinary_tract),8(liver),734(large_intestine),1(peritoneum),70(stomach),2(haematopoietic_and_lymphoid_tissue),5(small_intestine),42(central_nervous_system),21(salivary_gland),155(upper_aerodigestive_tract),30(ski…	PIK3CA;c.1633G>A;p.E545K;TCGA-D8-A1XY-01A-11D-A14K-09	PIK3CA;c.1633G>A;p.E545K;TCGA-N7-A4Y8-01A-11D-A28R-08	No	Yes	0.000274	14557	14150	4	A: 4; G: 14150	A: 474; G: 1443537	0.682	A: 225; G: 397429	0.956
036MS	chr17	31232863	31232863	G	-	NF1	NF1:ENST00000356175.7:exon26:c.3478delG:p.G1160Vfs*6,NF1:ENST00000358273.8:exon26:c.3478delG:p.G1160Vfs*6	.	.	NF1;c.3479delG;p.G1160Vfs*6;TCGA-17-Z015-01A-01W-0746-08	No	No	-	-	-	-	-	-	-	-	-
	chr3	179234297	179234297	A	T	PIK3CA	PIK3CA:ENST00000263967.3:exon21:c.A3140T:p.H1047L	ID=COSV55873401;OCCURENCE=5(biliary_tract),1(vulva),1(gastrointestinal_tract_(site_indeterminate)),1(cervix),2(kidney),284(breast),2(pancreas),25(soft_tissue),4(stomach),78(large_intestine),4(liver),18(urinary_tract),2(salivary_gland),7(central_nervous_system),12(haematopoietic_and_lymphoid_tissue),3(prostate),8(thyroid),6(skin),15(upper_aerodigestive_tract),13(ovary),1(bone),8(oesophagus),44(end…	PIK3CA;c.3140A>T;p.H1047L;TCGA-A8-A095-01A-11W-A019-09	PIK3CA;c.3140A>T;p.H1047L;TCGA-UY-A78M-01A-21D-A34U-08	No	Yes	0.000194	30842	30810	6	T: 6; A: 30810	T: 2673; A: 2205416	0.999	T: 351; A: 506433	0.999
039MS	chr14	104780214	104780214	C	T	AKT1	AKT1:ENST00000554581.5:exon2:c.G49A:p.E17K,AKT1:ENST00000402615.6:exon3:c.G49A:p.E17K,AKT1:ENST00000407796.6:exon3:c.G49A:p.E17K,AKT1:ENST00000554848.5:exon3:c.G49A:p.E17K,AKT1:ENST00000555528.5:exon3:c.G49A:p.E17K,AKT1:ENST00000349310.7:exon4:c.G49A:p.E17K	ID=COSV62571334;OCCURENCE=22(prostate),11(upper_aerodigestive_tract),58(skin),27(thyroid),5(salivary_gland),7(haematopoietic_and_lymphoid_tissue),2(central_nervous_system),6(NS),70(meninges),15(bone),9(ovary),49(lung),35(endometrium),8(cervix),1(thymus),3(biliary_tract),3(stomach),23(urinary_tract),2(peritoneum),50(large_intestine),1(kidney),372(breast),18(soft_tissue),6(pancreas)	AKT1;c.49G>A;p.E17K;TCGA-E2-A15I-01A-21D-A135-09	AKT1;c.49G>A;p.E17K;TCGA-A6-5661-01A-01D-1650-10	No	Yes	0.000609	34452	34389	21	T: 21; C: 34389	T: 3135; C: 3828092	0.930	T: 1318; C: 1269643	0.996
	chr17	16039637	16039637	C	A	NCOR1	NCOR1:ENST00000395857.7:exon42:c.G6463T:p.G2155C,NCOR1:ENST00000395851.5:exon43:c.G6442T:p.G2148C,NCOR1:ENST00000268712.7:exon44:c.G6751T:p.G2251C	ID=COSV99251141;OCCURENCE=1(upper_aerodigestive_tract)	.	NCOR1;c.6751G>T;p.G2251C;TCGA-QK-A6VB-01A-12D-A34J-08	No	Yes	0.000115	17297	17288	2	A: 2; C: 17288	A: 524; C: 1874371	0.953	A: 169; C: 469845	0.984
040MS	chr3	179204536	179204536	G	A	PIK3CA	PIK3CA:ENST00000263967.3:exon6:c.G1093A:p.E365K	ID=COSV55881636;OCCURENCE=2(stomach),4(large_intestine),4(urinary_tract),4(breast),1(biliary_tract),1(ovary),1(lung),9(endometrium),1(skin),1(central_nervous_system)	.	PIK3CA;c.1093G>A;p.E365K;TCGA-A6-A566-01A-11D-A28G-10	No	Yes	0.000237	21026	21011	5	A: 5; G: 21011	A: 736; G: 1922547	0.902	A: 414; G: 445378	0.999
	chr3	179218294	179218294	G	A	PIK3CA	PIK3CA:ENST00000263967.3:exon10:c.G1624A:p.E542K	ID=COSV55873227;OCCURENCE=49(stomach),116(urinary_tract),12(liver),470(large_intestine),14(kidney),622(breast),16(soft_tissue),8(pancreas),66(cervix),6(gastrointestinal_tract_(site_indeterminate)),1(thymus),6(vulva),13(biliary_tract),4(NS),31(oesophagus),1(bone),45(ovary),8(penis),74(lung),81(endometrium),1(pituitary),2(genital_tract),3(testis),10(prostate),78(upper_aerodigestive_tract),35(skin),…	PIK3CA;c.1624G>A;p.E542K;TCGA-HN-A2OB-01A-21D-A27P-09	PIK3CA;c.1624G>A;p.E542K;TCGA-AA-3812-01A-01W-0900-09	No	Yes	0.000210	23708	23383	5	A: 5; G: 23383	A: 512; G: 1418378	0.922	A: 299; G: 382285	0.999
045MS	chr14	104780214	104780214	C	T	AKT1	AKT1:ENST00000554581.5:exon2:c.G49A:p.E17K,AKT1:ENST00000402615.6:exon3:c.G49A:p.E17K,AKT1:ENST00000407796.6:exon3:c.G49A:p.E17K,AKT1:ENST00000554848.5:exon3:c.G49A:p.E17K,AKT1:ENST00000555528.5:exon3:c.G49A:p.E17K,AKT1:ENST00000349310.7:exon4:c.G49A:p.E17K	ID=COSV62571334;OCCURENCE=22(prostate),11(upper_aerodigestive_tract),58(skin),27(thyroid),5(salivary_gland),7(haematopoietic_and_lymphoid_tissue),2(central_nervous_system),6(NS),70(meninges),15(bone),9(ovary),49(lung),35(endometrium),8(cervix),1(thymus),3(biliary_tract),3(stomach),23(urinary_tract),2(peritoneum),50(large_intestine),1(kidney),372(breast),18(soft_tissue),6(pancreas)	AKT1;c.49G>A;p.E17K;TCGA-E2-A15I-01A-21D-A135-09	AKT1;c.49G>A;p.E17K;TCGA-A6-5661-01A-01D-1650-10	No	Yes	0.000666	36013	35936	24	T: 24; C: 35936	T: 3135; C: 3828092	0.863	T: 1318; C: 1269643	0.991
047MS	chr3	179234297	179234297	A	G	PIK3CA	PIK3CA:ENST00000263967.3:exon21:c.A3140G:p.H1047R	ID=COSV55873195;OCCURENCE=54(lung),216(endometrium),2(pituitary),14(bone),144(ovary),2(penis),22(oesophagus),5(meninges),17(NS),57(central_nervous_system),5(small_intestine),6(haematopoietic_and_lymphoid_tissue),1(placenta),28(salivary_gland),12(skin),32(thyroid),83(upper_aerodigestive_tract),27(prostate),1(testis),1(parathyroid),14(pancreas),63(soft_tissue),2194(breast),9(kidney),497(large_intes…	PIK3CA;c.3140A>G;p.H1047R;TCGA-AO-A0J5-01A-11W-A050-09	PIK3CA;c.3140A>G;p.H1047R;TCGA-N6-A4VD-01A-11D-A28R-08	No	Yes	0.000128	23415	23397	3	G: 3; A: 23397	G: 487; A: 2215794	0.886	G: 187; A: 506433	0.990
052MS	chr3	179218307	179218307	A	G	PIK3CA	PIK3CA:ENST00000263967.3:exon10:c.A1637G:p.Q546R	ID=COSV55876869;OCCURENCE=22(endometrium),10(ovary),1(NS),4(central_nervous_system),1(small_intestine),2(salivary_gland),5(upper_aerodigestive_tract),1(skin),1(thyroid),1(prostate),1(pancreas),32(breast),1(urinary_tract),29(large_intestine),4(stomach),1(biliary_tract),3(cervix),1(gastrointestinal_tract_(site_indeterminate))	PIK3CA;c.1637A>G;p.Q546R;TCGA-GM-A2DH-01A-11D-A17W-09	PIK3CA;c.1637A>G;p.Q546R;TCGA-N7-A4Y5-01A-12D-A28R-08	No	Yes	0.000253	11851	11337	3	G: 3; A: 11337	G: 1146; A: 1460512	0.993	G: 698; A: 392257	0.999
	chr3	179234230	179234230	A	G	PIK3CA	PIK3CA:ENST00000263967.3:exon21:c.A3073G:p.T1025A	ID=COSV55873252;OCCURENCE=1(soft_tissue),7(breast),10(large_intestine),4(stomach),1(central_nervous_system),1(thyroid),1(prostate),1(pituitary),25(endometrium),2(ovary)	PIK3CA;c.3073A>G;p.T1025A;TCGA-EW-A1PE-01A-11D-A142-09	PIK3CA;c.3073A>G;p.T1025A;TCGA-CK-4951-01A-01D-1408-10	No	Yes	0.000755	27797	27702	21	G: 21; A: 27702	G: 3290; A: 3582661	0.835	G: 878; A: 746458	0.986
056MS	chr3	179218294	179218294	G	A	PIK3CA	PIK3CA:ENST00000263967.3:exon10:c.G1624A:p.E542K	ID=COSV55873227;OCCURENCE=49(stomach),116(urinary_tract),12(liver),470(large_intestine),14(kidney),622(breast),16(soft_tissue),8(pancreas),66(cervix),6(gastrointestinal_tract_(site_indeterminate)),1(thymus),6(vulva),13(biliary_tract),4(NS),31(oesophagus),1(bone),45(ovary),8(penis),74(lung),81(endometrium),1(pituitary),2(genital_tract),3(testis),10(prostate),78(upper_aerodigestive_tract),35(skin),…	PIK3CA;c.1624G>A;p.E542K;TCGA-HN-A2OB-01A-21D-A27P-09	PIK3CA;c.1624G>A;p.E542K;TCGA-AA-3812-01A-01W-0900-09	No	Yes	0.0000923	10824	10525	1	A: 1; G: 10525	A: 512; G: 1418378	0.977	A: 299; G: 382285	0.999
057MS	chr3	179218303	179218303	G	A	PIK3CA	PIK3CA:ENST00000263967.3:exon10:c.G1633A:p.E545K	ID=COSV55873239;OCCURENCE=3(thymus),16(vulva),32(biliary_tract),142(cervix),8(gastrointestinal_tract_(site_indeterminate)),12(soft_tissue),14(pancreas),9(kidney),984(breast),1(vagina),219(urinary_tract),8(liver),734(large_intestine),1(peritoneum),70(stomach),2(haematopoietic_and_lymphoid_tissue),5(small_intestine),42(central_nervous_system),21(salivary_gland),155(upper_aerodigestive_tract),30(ski…	PIK3CA;c.1633G>A;p.E545K;TCGA-D8-A1XY-01A-11D-A14K-09	PIK3CA;c.1633G>A;p.E545K;TCGA-N7-A4Y8-01A-11D-A28R-08	No	No	-	-	-	-	-	-	-	-	-
060MS	chr5	56859894	56859895	AA	-	MAP3K1	MAP3K1:ENST00000399503.3:exon3:c.813_814del:p.R273Sfs*27	.	.	MAP3K1;c.816_817delAA;p.R273Sfs*27;TCGA-B5-A0JZ-01A-11W-A062-09	No	No	-	-	-	-	-	-	-	-	-
064MS	chr3	179203765	179203765	T	A	PIK3CA	PIK3CA:ENST00000263967.3:exon5:c.T1035A:p.N345K	ID=COSV55873276;OCCURENCE=2(skin),2(upper_aerodigestive_tract),4(prostate),5(central_nervous_system),2(salivary_gland),1(NS),5(lung),11(endometrium),4(ovary),4(oesophagus),1(biliary_tract),18(large_intestine),5(urinary_tract),9(stomach),2(soft_tissue),202(breast)	PIK3CA;c.1035T>A;p.N345K;TCGA-AO-A03L-01A-41W-A071-09	PIK3CA;c.1035T>A;p.N345K;TCGA-AA-3837-01A-01W-0900-09	No	Yes	0.000669	8956	8938	6	A: 6; T: 8938	A: 698; T: 721479	0.860	A: 239; T: 162580	0.989
065MS	chr10	8069470	8069471	CA	-	GATA3	.	ID=COSV60515023;OCCURENCE=63(breast)	GATA3;c.922-3_922-2delCA;p.X308_splice;TCGA-A8-A083-01A-21W-A019-09	GATA3;c.922-3_922-2delCA;p.X308_splice;TCGA-A8-A083-01A-21W-A019-09	No	No	-	-	-	-	-	-	-	-	-
	chr3	179234297	179234297	A	G	PIK3CA	PIK3CA:ENST00000263967.3:exon21:c.A3140G:p.H1047R	ID=COSV55873195;OCCURENCE=54(lung),216(endometrium),2(pituitary),14(bone),144(ovary),2(penis),22(oesophagus),5(meninges),17(NS),57(central_nervous_system),5(small_intestine),6(haematopoietic_and_lymphoid_tissue),1(placenta),28(salivary_gland),12(skin),32(thyroid),83(upper_aerodigestive_tract),27(prostate),1(testis),1(parathyroid),14(pancreas),63(soft_tissue),2194(breast),9(kidney),497(large_intes…	PIK3CA;c.3140A>G;p.H1047R;TCGA-AO-A0J5-01A-11W-A050-09	PIK3CA;c.3140A>G;p.H1047R;TCGA-N6-A4VD-01A-11D-A28R-08	No	Yes	0.000148	20225	20200	3	G: 3; A: 20200	G: 487; A: 2215794	-	G: 187; A: 506433	0.977
066MS	chr17	39724008	39724008	G	T	ERBB2	ERBB2:ENST00000445658.6:exon13:c.G1477T:p.D493Y,ERBB2:ENST00000269571.9:exon19:c.G2305T:p.D769Y,ERBB2:ENST00000406381.6:exon19:c.G2215T:p.D739Y,ERBB2:ENST00000541774.5:exon19:c.G2260T:p.D754Y,ERBB2:ENST00000584450.5:exon19:c.G2305T:p.D769Y,ERBB2:ENST00000584601.5:exon23:c.G2215T:p.D739Y	ID=COSV54062373;OCCURENCE=30(breast),2(urinary_tract),2(large_intestine),2(stomach),1(biliary_tract),4(oesophagus),1(salivary_gland)	ERBB2;c.2305G>T;p.D769Y;TCGA-BH-A1FE-01A-11D-A13L-09	ERBB2;c.2305G>T;p.D769Y;TCGA-MV-A51V-01A-11D-A26M-08	No	Yes	0.000337	17753	17725	6	T: 6; G: 17725	T: 980; G: 2679810	0.628	T: 363; G: 909118	0.708
	chr3	179218294	179218294	G	A	PIK3CA	PIK3CA:ENST00000263967.3:exon10:c.G1624A:p.E542K	ID=COSV55873227;OCCURENCE=49(stomach),116(urinary_tract),12(liver),470(large_intestine),14(kidney),622(breast),16(soft_tissue),8(pancreas),66(cervix),6(gastrointestinal_tract_(site_indeterminate)),1(thymus),6(vulva),13(biliary_tract),4(NS),31(oesophagus),1(bone),45(ovary),8(penis),74(lung),81(endometrium),1(pituitary),2(genital_tract),3(testis),10(prostate),78(upper_aerodigestive_tract),35(skin),…	PIK3CA;c.1624G>A;p.E542K;TCGA-HN-A2OB-01A-21D-A27P-09	PIK3CA;c.1624G>A;p.E542K;TCGA-AA-3812-01A-01W-0900-09	No	Yes	0.000144	13862	13584	2	A: 2; G: 13584	A: 512; G: 1418378	0.955	A: 299; G: 382285	0.999
079MS	chr17	7674221	7674221	G	A	TP53	TP53:ENST00000504290.5:exon3:c.C346T:p.R116W,TP53:ENST00000504937.5:exon3:c.C346T:p.R116W,TP53:ENST00000510385.5:exon3:c.C346T:p.R116W,TP53:ENST00000610623.4:exon3:c.C265T:p.R89W,TP53:ENST00000618944.4:exon3:c.C265T:p.R89W,TP53:ENST00000619186.4:exon3:c.C265T:p.R89W,TP53:ENST00000359597.8:exon6:c.C742T:p.R248W,TP53:ENST00000413465.6:exon6:c.C742T:p.R248W,TP53:ENST00000610292.4:exon6:c.C625T:p.R20…	ID=COSV52662035;OCCURENCE=58(ovary),2(bone),1(penis),65(oesophagus),54(lung),31(endometrium),11(NS),2(salivary_gland),63(central_nervous_system),70(haematopoietic_and_lymphoid_tissue),17(prostate),2(genital_tract),55(skin),8(thyroid),53(upper_aerodigestive_tract),115(breast),14(kidney),44(pancreas),11(soft_tissue),52(stomach),246(large_intestine),28(urinary_tract),5(liver),2(pleura),4(vulva),16(b…	TP53;c.742C>T;p.R248W;TCGA-C8-A12P-01A-11D-A10Y-09	TP53;c.742C>T;p.R248W;TCGA-N8-A4PP-01A-11D-A28R-08	No	Yes	0.000521	67119	67014	35	A: 35; G: 67014	A: 1836; G: 4738630	0.053	A: 509; G: 1486347	0.013
	chr3	179218307	179218307	A	G	PIK3CA	PIK3CA:ENST00000263967.3:exon10:c.A1637G:p.Q546R	ID=COSV55876869;OCCURENCE=22(endometrium),10(ovary),1(NS),4(central_nervous_system),1(small_intestine),2(salivary_gland),5(upper_aerodigestive_tract),1(skin),1(thyroid),1(prostate),1(pancreas),32(breast),1(urinary_tract),29(large_intestine),4(stomach),1(biliary_tract),3(cervix),1(gastrointestinal_tract_(site_indeterminate))	PIK3CA;c.1637A>G;p.Q546R;TCGA-GM-A2DH-01A-11D-A17W-09	PIK3CA;c.1637A>G;p.Q546R;TCGA-N7-A4Y5-01A-12D-A28R-08	No	Yes	0.000132	22725	21806	3	G: 3; A: 21806	G: 1146; A: 1460512	0.999	G: 698; A: 392257	0.999
080MS	chr3	179218303	179218303	G	A	PIK3CA	PIK3CA:ENST00000263967.3:exon10:c.G1633A:p.E545K	ID=COSV55873239;OCCURENCE=3(thymus),16(vulva),32(biliary_tract),142(cervix),8(gastrointestinal_tract_(site_indeterminate)),12(soft_tissue),14(pancreas),9(kidney),984(breast),1(vagina),219(urinary_tract),8(liver),734(large_intestine),1(peritoneum),70(stomach),2(haematopoietic_and_lymphoid_tissue),5(small_intestine),42(central_nervous_system),21(salivary_gland),155(upper_aerodigestive_tract),30(ski…	PIK3CA;c.1633G>A;p.E545K;TCGA-D8-A1XY-01A-11D-A14K-09	PIK3CA;c.1633G>A;p.E545K;TCGA-N7-A4Y8-01A-11D-A28R-08	No	Yes	0.000351	8544	8320	3	A: 3; G: 8320	A: 474; G: 1443537	0.515	A: 225; G: 397429	0.847
093MS	chr3	179218304	179218304	A	G	PIK3CA	PIK3CA:ENST00000263967.3:exon10:c.A1634G:p.E545G	ID=COSV55873220;OCCURENCE=9(stomach),1(NS),79(large_intestine),5(liver),10(urinary_tract),1(penis),4(ovary),31(breast),1(pituitary),18(endometrium),4(lung),1(eye),2(prostate),10(skin),1(cervix),5(upper_aerodigestive_tract),7(central_nervous_system),2(haematopoietic_and_lymphoid_tissue)	PIK3CA;c.1634A>G;p.E545G;TCGA-AC-A5XS-01A-11D-A29N-09	PIK3CA;c.1634A>G;p.E545G;TCGA-4Z-AA7Y-01A-11D-A391-08	No	Yes	0.00239	21317	20877	51	G: 51; A: 20877	G: 3081; A: 1488494	0.137	G: 966; A: 395358	0.520
095MS	chr3	179234297	179234297	A	T	PIK3CA	PIK3CA:ENST00000263967.3:exon21:c.A3140T:p.H1047L	ID=COSV55873401;OCCURENCE=5(biliary_tract),1(vulva),1(gastrointestinal_tract_(site_indeterminate)),1(cervix),2(kidney),284(breast),2(pancreas),25(soft_tissue),4(stomach),78(large_intestine),4(liver),18(urinary_tract),2(salivary_gland),7(central_nervous_system),12(haematopoietic_and_lymphoid_tissue),3(prostate),8(thyroid),6(skin),15(upper_aerodigestive_tract),13(ovary),1(bone),8(oesophagus),44(end…	PIK3CA;c.3140A>T;p.H1047L;TCGA-A8-A095-01A-11W-A019-09	PIK3CA;c.3140A>T;p.H1047L;TCGA-UY-A78M-01A-21D-A34U-08	No	Yes	0.000397	25148	25133	10	T: 10; A: 25133	T: 2673; A: 2205416	0.999	T: 351; A: 506433	0.977
099MS	chr3	179234297	179234297	A	T	PIK3CA	PIK3CA:ENST00000263967.3:exon21:c.A3140T:p.H1047L	ID=COSV55873401;OCCURENCE=5(biliary_tract),1(vulva),1(gastrointestinal_tract_(site_indeterminate)),1(cervix),2(kidney),284(breast),2(pancreas),25(soft_tissue),4(stomach),78(large_intestine),4(liver),18(urinary_tract),2(salivary_gland),7(central_nervous_system),12(haematopoietic_and_lymphoid_tissue),3(prostate),8(thyroid),6(skin),15(upper_aerodigestive_tract),13(ovary),1(bone),8(oesophagus),44(end…	PIK3CA;c.3140A>T;p.H1047L;TCGA-A8-A095-01A-11W-A019-09	PIK3CA;c.3140A>T;p.H1047L;TCGA-UY-A78M-01A-21D-A34U-08	No	Yes	0.000490	16299	16269	8	T: 8; A: 16269	T: 2673; A: 2205416	0.999	T: 351; A: 506433	0.871
101MS	chr2	197402110	197402110	T	C	SF3B1	SF3B1:ENST00000335508.10:exon15:c.A2098G:p.K700E	ID=COSV59205318;OCCURENCE=2(central_nervous_system),524(haematopoietic_and_lymphoid_tissue),1(salivary_gland),1(skin),7(prostate),3(lung),1(oesophagus),17(NS),5(biliary_tract),1(eye),16(pancreas),1(soft_tissue),82(breast),2(kidney),1(large_intestine)	SF3B1;c.2098A>G;p.K700E;TCGA-B6-A0WT-01A-11D-A10G-09	SF3B1;c.2098A>G;p.K700E;TCGA-AB-2929-03A-01W-0732-08	No	Yes	0.00192	30137	30018	58	C: 58; T: 30018	C: 4074; T: 2636516	0.056	C: 1370; T: 614103	0.873
104MS	chr17	7674248	7674248	T	C	TP53	TP53:ENST00000504290.5:exon3:c.A319G:p.N107D,TP53:ENST00000504937.5:exon3:c.A319G:p.N107D,TP53:ENST00000510385.5:exon3:c.A319G:p.N107D,TP53:ENST00000610623.4:exon3:c.A238G:p.N80D,TP53:ENST00000618944.4:exon3:c.A238G:p.N80D,TP53:ENST00000619186.4:exon3:c.A238G:p.N80D,TP53:ENST00000359597.8:exon6:c.A715G:p.N239D,TP53:ENST00000413465.6:exon6:c.A715G:p.N239D,TP53:ENST00000610292.4:exon6:c.A598G:p.N20…	ID=COSV52664075;OCCURENCE=16(haematopoietic_and_lymphoid_tissue),2(biliary_tract),2(central_nervous_system),1(salivary_gland),1(thyroid),5(upper_aerodigestive_tract),5(prostate),11(lung),1(pancreas),2(endometrium),12(ovary),2(kidney),3(oesophagus),12(breast),1(peritoneum),6(large_intestine),2(urinary_tract),1(liver),1(fallopian_tube),2(stomach)	.	TP53;c.715A>G;p.N239D;TCGA-J2-A4AD-01A-11D-A24D-08	No	Yes	0.000332	30035	29970	10	C: 10; T: 29970	C: 2876; T: 4564051	0.990	C: 1318; T: 1391443	0.999
107MS	chr10	8069470	8069471	CA	-	GATA3	.	ID=COSV60515023;OCCURENCE=63(breast)	GATA3;c.922-3_922-2delCA;p.X308_splice;TCGA-A8-A083-01A-21W-A019-09	GATA3;c.922-3_922-2delCA;p.X308_splice;TCGA-A8-A083-01A-21W-A019-09	No	Yes	0.000335	23874	22762	8	-2CA: 8; CA: 22762	-2CA: 0; CA: 3017268	9.893E-18	-2CA: 0; CA: 828065	2.62E-13

## Sheet: Table S5 
Table S5. Novel mutations observed in plasma samples using the non-tumour informed analysis. It is indicated if the tumour tissues were sequenced and any mutation was found in them. VAF, variant allele frequency; DP, sequencing depth; REF_AD, reads for the reference allele; MUT_AD, reads for the mutated allele.
Sample	Chr	Start	End	Ref	Alt	Func ensGene	Gene ensGene	ExonicFunc ensGene	AAChange ensGene	cosmic95	tcgaBC	tcgaALL	VAF	DP	REF_AD	MUT_AD	COS + TCGA BC + TCGAall	Tumour biopsy sequenced	Any mutation in tumour
011MS	chr5	56865968	56865968	C	A	exonic	MAP3K1	stopgain	MAP3K1:ENST00000399503.3:exon6:c.C1292A:p.S431X	ID=COSV68121571;OCCURENCE=3(breast)	MAP3K1;c.1292C>A;p.S431*;TCGA-A8-A09B-01A-11W-A019-09	MAP3K1;c.1292C>A;p.S431*;TCGA-A8-A09B-01A-11W-A019-09	0.002388	3599	3591	8	Yes	Yes	No
030MS	chr2	197402735	197402735	G	A	exonic	SF3B1	nonsynonymous SNV	SF3B1:ENST00000335508.10:exon14:c.C1898T:p.A633V	ID=COSV59219482;OCCURENCE=1(breast)	SF3B1;c.1898C>T;p.A633V;TCGA-B6-A0I2-01A-11W-A050-09	SF3B1;c.1898C>T;p.A633V;TCGA-B6-A0I2-01A-11W-A050-09	0.003893	1517	1512	5	Yes	Yes	Yes
049MS	chr17	16086437	16086437	G	A	exonic	NCOR1	stopgain	NCOR1:ENST00000395857.7:exon21:c.C2743T:p.Q915X,NCOR1:ENST00000395851.5:exon22:c.C3070T:p.Q1024X,NCOR1:ENST00000268712.7:exon23:c.C3022T:p.Q1008X	ID=COSV51974206;OCCURENCE=1(breast)	NCOR1;c.3022C>T;p.Q1008*;TCGA-A8-A093-01A-11W-A019-09	NCOR1;c.3022C>T;p.Q1008*;TCGA-A8-A093-01A-11W-A019-09	0.003616	2644	2635	9	Yes	Yes	No
050MS	chr2	197402110	197402110	T	C	exonic	SF3B1	nonsynonymous SNV	SF3B1:ENST00000335508.10:exon15:c.A2098G:p.K700E	ID=COSV59205318;OCCURENCE=2(central_nervous_system),524(haematopoietic_and_lymphoid_tissue),1(salivary_gland),1(skin),7(prostate),3(lung),1(oesophagus),17(NS),5(biliary_tract),1(eye),16(pancreas),1(soft_tissue),82(breast),2(kidney),1(large_intestine)	SF3B1;c.2098A>G;p.K700E;TCGA-B6-A0WT-01A-11D-A10G-09	SF3B1;c.2098A>G;p.K700E;TCGA-AB-2929-03A-01W-0732-08	0.014	2430	2397	33	Yes	Yes	No
	chr17	7674230	7674230	C	T	exonic	TP53	nonsynonymous SNV	TP53:ENST00000504290.5:exon3:c.G337A:p.G113S,TP53:ENST00000504937.5:exon3:c.G337A:p.G113S,TP53:ENST00000510385.5:exon3:c.G337A:p.G113S,TP53:ENST00000610623.4:exon3:c.G256A:p.G86S,TP53:ENST00000618944.4:exon3:c.G256A:p.G86S,TP53:ENST00000619186.4:exon3:c.G256A:p.G86S,TP53:ENST00000359597.8:exon6:c.G733A:p.G245S,TP53:ENST00000413465.6:exon6:c.G733A:p.G245S,TP53:ENST00000610292.4:exon6:c.G616A:p.G20…	ID=COSV52661877;OCCURENCE=4(salivary_gland),45(central_nervous_system),8(small_intestine),42(haematopoietic_and_lymphoid_tissue),20(prostate),29(upper_aerodigestive_tract),12(skin),1(adrenal_gland),6(thyroid),36(oesophagus),28(ovary),1(bone),1(penis),18(lung),13(endometrium),3(NS),5(biliary_tract),6(vulva),2(cervix),1(gastrointestinal_tract_(site_indeterminate)),49(breast),2(kidney),4(soft_tissue…	TP53;c.733G>A;p.G245S;TCGA-E9-A22E-01A-11D-A159-09	TP53;c.733G>A;p.G245S;TCGA-AA-3511-01A-21D-1835-10	0.00321	2729	2721	8	Yes	Yes	No
053MS	chr11	534289	534289	C	A	exonic	HRAS	nonsynonymous SNV	HRAS:ENST00000397594.5:exon1:c.G34T:p.G12C,HRAS:ENST00000311189.7:exon2:c.G34T:p.G12C,HRAS:ENST00000397596.6:exon2:c.G34T:p.G12C,HRAS:ENST00000417302.5:exon2:c.G34T:p.G12C,HRAS:ENST00000451590.5:exon2:c.G34T:p.G12C	ID=COSV54236828;OCCURENCE=10(urinary_tract),2(soft_tissue),2(breast),2(lung),12(skin),5(thyroid),9(upper_aerodigestive_tract),1(salivary_gland)	HRAS;c.34G>T;p.G12C;TCGA-S3-AA10-01A-21D-A41F-09	HRAS;c.34G>T;p.G12C;TCGA-CV-7183-01A-11D-2012-08	0.008942	1329	1318	11	Yes	Yes	No
056MS	chrX	41152979	41152979	C	T	exonic	USP9X	nonsynonymous SNV	USP9X:ENST00000324545.8:exon14:c.C1795T:p.R599C,USP9X:ENST00000378308.6:exon14:c.C1795T:p.R599C	ID=COSV100199767;OCCURENCE=1(breast)	USP9X;c.1795C>T;p.R599C;TCGA-A8-A07W-01A-11W-A019-09	USP9X;c.1795C>T;p.R599C;TCGA-A8-A07W-01A-11W-A019-09	0.004816	1426	1420	6	Yes	Yes	Yes
062MS	chr3	52406327	52406327	G	A	exonic	BAP1	nonsynonymous SNV	BAP1:ENST00000460680.5:exon9:c.C709T:p.R237C	ID=COSV56232324;OCCURENCE=1(breast),1(liver),1(oesophagus)	BAP1;c.709C>T;p.R237C;TCGA-BH-A0GY-01A-11W-A071-09	BAP1;c.709C>T;p.R237C;TCGA-BH-A0GY-01A-11W-A071-09	0.004056	3154	3142	12	Yes	Yes	No
080MS	chr5	68295248	68295248	C	T	exonic	PIK3R1	stopgain	PIK3R1:ENST00000523872.1:exon6:c.C580T:p.R194X,PIK3R1:ENST00000320694.12:exon7:c.C769T:p.R257X,PIK3R1:ENST00000336483.9:exon7:c.C859T:p.R287X,PIK3R1:ENST00000521381.5:exon13:c.C1669T:p.R557X,PIK3R1:ENST00000521657.5:exon13:c.C1669T:p.R557X	ID=COSV57125577;OCCURENCE=2(skin),1(central_nervous_system),2(large_intestine),1(breast)	PIK3R1;c.1669C>T;p.R557*;TCGA-AN-A046-01A-21W-A050-09	PIK3R1;c.1669C>T;p.R557*;TCGA-AN-A046-01A-21W-A050-09	0.003182	1832	1827	5	Yes	Yes	Yes
081MS	chr17	7674894	7674894	G	A	exonic	TP53	stopgain	TP53:ENST00000504290.5:exon2:c.C241T:p.R81X,TP53:ENST00000504937.5:exon2:c.C241T:p.R81X,TP53:ENST00000510385.5:exon2:c.C241T:p.R81X,TP53:ENST00000610623.4:exon2:c.C160T:p.R54X,TP53:ENST00000618944.4:exon2:c.C160T:p.R54X,TP53:ENST00000619186.4:exon2:c.C160T:p.R54X,TP53:ENST00000359597.8:exon5:c.C637T:p.R213X,TP53:ENST00000413465.6:exon5:c.C637T:p.R213X,TP53:ENST00000610292.4:exon5:c.C520T:p.R174X,…	ID=COSV52665560;OCCURENCE=13(biliary_tract),1(pleura),3(gastrointestinal_tract_(site_indeterminate)),1(cervix),31(pancreas),9(soft_tissue),7(kidney),99(breast),1(peritoneum),153(large_intestine),18(urinary_tract),9(liver),38(stomach),2(small_intestine),22(central_nervous_system),24(haematopoietic_and_lymphoid_tissue),4(salivary_gland),64(skin),8(thyroid),1(adrenal_gland),43(upper_aerodigestive_tr…	TP53;c.637C>T;p.R213*;TCGA-AO-A124-01A-11D-A10M-09	TP53;c.637C>T;p.R213*;TCGA-ND-A4WC-01A-21D-A28R-08	0.006438	1668	1658	10	Yes	Yes	Yes
092MS	chr1	26766456	26766456	G	A	splicing	ARID1A	.	.	ID=COSV61372173;OCCURENCE=1(urinary_tract),2(liver),1(large_intestine),1(breast)	ARID1A;c.2879-1G>A;p.X960_splice;TCGA-WT-AB41-01A-11D-A41F-09	ARID1A;c.2879-1G>A;p.X960_splice;TCGA-AA-3930-01A-01W-0995-10	0.003293	3214	3204	10	Yes	No	-
094MS	chr17	7675084	7675084	G	T	exonic	TP53	stopgain	TP53:ENST00000504290.5:exon1:c.C132A:p.C44X,TP53:ENST00000504937.5:exon1:c.C132A:p.C44X,TP53:ENST00000510385.5:exon1:c.C132A:p.C44X,TP53:ENST00000610623.4:exon1:c.C51A:p.C17X,TP53:ENST00000618944.4:exon1:c.C51A:p.C17X,TP53:ENST00000619186.4:exon1:c.C51A:p.C17X,TP53:ENST00000359597.8:exon4:c.C528A:p.C176X,TP53:ENST00000413465.6:exon4:c.C528A:p.C176X,TP53:ENST00000610292.4:exon4:c.C411A:p.C137X,TP5…	ID=COSV52701599;OCCURENCE=1(haematopoietic_and_lymphoid_tissue),1(genital_tract),2(oesophagus),1(ovary),1(lung),1(NS),2(vulva),3(breast),1(pancreas),1(stomach),1(urinary_tract),2(large_intestine)	TP53;c.528C>A;p.C176*;TCGA-E2-A150-01A-11D-A12B-09	TP53;c.528C>A;p.C176*;TCGA-AA-3866-01A-01W-0995-10	0.003276	2970	2961	9	Yes	Yes	No
099MS	chr13	32333264	32333264	G	A	exonic	BRCA2	nonsynonymous SNV	BRCA2:ENST00000380152.7:exon10:c.G1786A:p.D596N,BRCA2:ENST00000544455.5:exon10:c.G1786A:p.D596N	ID=COSV101204678;OCCURENCE=1(breast)	BRCA2;c.1786G>A;p.D596N;TCGA-LL-A73Y-01A-11D-A33E-09	BRCA2;c.1786G>A;p.D596N;TCGA-LL-A73Y-01A-11D-A33E-09	0.004508	1319	1314	5	Yes	Yes	Yes
101MS	chrX	41152979	41152979	C	T	exonic	USP9X	nonsynonymous SNV	USP9X:ENST00000324545.8:exon14:c.C1795T:p.R599C,USP9X:ENST00000378308.6:exon14:c.C1795T:p.R599C	ID=COSV100199767;OCCURENCE=1(breast)	USP9X;c.1795C>T;p.R599C;TCGA-A8-A07W-01A-11W-A019-09	USP9X;c.1795C>T;p.R599C;TCGA-A8-A07W-01A-11W-A019-09	0.002096	3244	3238	6	Yes	Yes	Yes
	chr16	68801726	68801726	C	T	exonic	CDH1	stopgain	CDH1:ENST00000261769.9:exon3:c.C220T:p.R74X,CDH1:ENST00000422392.6:exon3:c.C220T:p.R74X,CDH1:ENST00000611625.4:exon3:c.C220T:p.R74X,CDH1:ENST00000612417.4:exon3:c.C220T:p.R74X,CDH1:ENST00000621016.4:exon3:c.C220T:p.R74X	ID=COSV55732282;OCCURENCE=7(breast),1(stomach)	CDH1;c.220C>T;p.R74*;TCGA-AR-A5QM-01A-11D-A27P-09	CDH1;c.220C>T;p.R74*;TCGA-AR-A5QM-01A-11D-A27P-09	0.002794	2453	2447	6	Yes	Yes	Yes
105MS	chr10	8064131	8064131	G	A	exonic	GATA3	nonsynonymous SNV	GATA3:ENST00000346208.3:exon4:c.G914A:p.R305Q,GATA3:ENST00000379328.7:exon4:c.G917A:p.R306Q	ID=COSV60515516;OCCURENCE=1(central_nervous_system),3(breast),1(large_intestine)	GATA3;c.914G>A;p.R305Q;TCGA-D8-A1J8-01A-11D-A13L-09	GATA3;c.914G>A;p.R305Q;TCGA-AA-3984-01A-02D-1981-10	0.002777	2794	2787	7	Yes	Yes	No

## Sheet: Table S6 
Table S6. Genetic variations observed in the plasma sequencing from healthy women. VAF, variant allele frequency; DP, sequencing depth; REF_AD, reads for the reference allele; MUT_AD, reads for the mutated allele.
Sample	Chr	Start	End	Ref	Alt	Func.ensGene	Gene.ensGene	ExonicFunc.ensGene	AAChange.ensGene	cosmic95	tcgaBRCA	tcgaALL	VAF	DP	REF_AD	MUT_AD
042MS	chr5	56882573	56882573	A	G	exonic	MAP3K1	nonsynonymous SNV	MAP3K1:ENST00000399503.3:exon14:c.A3373G:p.N1125D	ID=COSV68128202;OCCURENCE=1(breast)	MAP3K1;c.3373A>G;p.N1125D;TCGA-A8-A06P-01A-11W-A019-09	MAP3K1;c.3373A>G;p.N1125D;TCGA-A8-A06P-01A-11W-A019-09	0.0031362	2232	2225	7
077MS	chr17	39725079	39725079	G	A	exonic	ERBB2	nonsynonymous SNV	ERBB2:ENST00000445658.6:exon15:c.G1696A:p.V566I,ERBB2:ENST00000269571.9:exon21:c.G2524A:p.V842I,ERBB2:ENST00000406381.6:exon21:c.G2434A:p.V812I,ERBB2:ENST00000541774.5:exon21:c.G2479A:p.V827I,ERBB2:ENST00000584450.5:exon21:c.G2524A:p.V842I,ERBB2:ENST00000584601.5:exon25:c.G2434A:p.V812I	ID=COSV54062791;OCCURENCE=3(biliary_tract),4(cervix),4(pancreas),6(breast),25(large_intestine),2(urinary_tract),13(stomach),3(small_intestine),1(upper_aerodigestive_tract),1(prostate),10(endometrium),1(ovary),2(oesophagus)	ERBB2;c.2524G>A;p.V842I;TCGA-A8-A08Z-01A-21W-A019-09	ERBB2;c.2524G>A;p.V842I;TCGA-N5-A4RJ-01A-11D-A28R-08	0.00270514	3327	3318	9
086MS	chr18	51065549	51065549	G	A	exonic	SMAD4	nonsynonymous SNV	SMAD4:ENST00000588745.5:exon5:c.G794A:p.R265H,SMAD4:ENST00000342988.7:exon9:c.G1082A:p.R361H,SMAD4:ENST00000398417.6:exon9:c.G1082A:p.R361H	ID=COSV61684056;OCCURENCE=20(pancreas),3(breast),3(urinary_tract),1(liver),1(peritoneum),109(large_intestine),5(stomach),9(biliary_tract),5(cervix),8(lung),2(endometrium),5(oesophagus),3(small_intestine),3(upper_aerodigestive_tract),1(skin),1(thyroid),2(prostate)	SMAD4;c.1082G>A;p.R361H;TCGA-B6-A2IU-01A-32D-A19T-09	SMAD4;c.1082G>A;p.R361H;TCGA-A6-A565-01A-31D-A28G-10	0.00493827	1215	1209	6

## Sheet: Table S7
Table S7. Associations between clinicopathological variables and plasma sequencing results. AF, allele frequency, ctDNA, circulating tumour DNA.
Clinical characteristics	Total	ctDNA-positive	p-value		Total	Median AF >0,5%	p-value		Total	2 mutations in plasma	p-value		Total	TP53 Mutated	p-value
	n	n (%)			n	n (%)			n	n (%)			n	n (%)
Diagnostic age (years)			1				0.270				1				0.102
30-50	13	4 (30.76%)			4	2 (50%)			4	0 (0%)			4	3 (75%)
>50	61	19 (31.14%)			19	4 (21.05%)			19	3 (15.78%)			19	5 (26.31%)
Tumour size			0.927				0.803				0.720				0.838
<2cm	32	10 (31.25%)			10	2 (20%)			10	1 (10%)			10	4 (40%)
2-5cm	37	11 (29.72%)			11	3 (27.27%)			11	3 (27.27%)			11	4 (36.36%)
>5cm	5	2 (40%)			2	1 (50%)			2	0 (0%)			2	0 (0%)
Tumour grade			0.141				0.046				0.691				0.228
I	15	2 (13.33%)			2	1 (50%)			2	0 (0%)			2	0 (0%)
II	37	15 (40.54%)			15	1 (6.66%)			15	2 (13.33%)			15	4 (26.66%)
III	22	6 (27.27%)			6	3 (50%)			6	2 (33.33%)			6	4 (66.66%)
Axilar lymph node			0.793				0.335				0.565				0.642
Positive	28	9 (32.14%)			9	4 (44.44%)			9	2 (22.22%)			9	4 (44.44%)
Negative	38	11 (28.94%)			11	2 (18.18%)			11	1 (9.09%)			11	3 (27.27%)
Tumour stage			0.614				1				0.476				0.854
1	22	6 (27.27%)			6	2 (33.33%)			6	0 (0%)			6	2 (33.33%)
2	38	11 (28.94%)			11	3 (27.27%)			11	3 (27.27%)			11	5 (45.45%)
3	9	4 (44.44%)			4	1 (25%)			4	1 (25%)			4	1 (25%)
Estrogen receptor			0.671				0.155				1				0.031
Positive	66	20 (30.30%)			20	4 (20%)			20	4 (20%)			20	5 (25%)
Negative	7	3 (42.85%)			3	2 (66.66%)			3	0 (0%)			3	3 (100%)
Progesterone receptor			0.377				0.318				0.557				0.025
Positive	56	16 (28.57%)			16	3 (18.75%)			16	2 (12.5%)			16	3 (18.75%)
Negative	17	7 (41.17%)			7	3 (42.85%)			7	2 (28.57%)			7	5 (71.42%)
HER2 status			1				0.260				1				0.347
Positive	6	2 (33,33%)			1	1 (100%)			1	0 (0%)			1	1 (100%)
Negative	67	21 (31.34%)			22	5 (22.72%)			22	4 (18.18%)			22	7 (31.81%)
ki67			1				0.640				0.316				0.666
<20	36	11 (30.55%)			11	2 (18.18%)			11	3 (27.27%)			11	3 (27.27%)
>=20	36	12 (33.33%)			12	4 (33.33%)			12	1 (8.33%)			12	5 (41.66%)
BIRADS category			0.804				0.370				1				1
4/B/C	40	12 (30%)			12	2 (16.66%)			12	2 (16.66%)			12	4 (33.33%)
5	33	11 (33.33%)			11	4 (36.36%)			11	2 (18.18%)			11	4 (36.36%)
Clinical relapse			1				0.059				0.023				0.110
Yes	8	2 (25%)			2	2 (100%)			2	2 (100%)			2	2 (100%)
No	64	21 (32.81%)			21	4 (19.94%)			21	2 (9.5%)			21	6 (28,57%)

## Sheet: Table S8
Table S8. Gene regions included in the custom capture panel (Human genome reference GRCh38).
Chromosome	Start	End	Gene ID
chr1	26696371	26697571	ARID1A
chr1	26729624	26729888	ARID1A
chr1	26731125	26731629	ARID1A
chr1	26732601	26732865	ARID1A
chr1	26760819	26761131	ARID1A
chr1	26761308	26761548	ARID1A
chr1	26762115	26762355	ARID1A
chr1	26762936	26763320	ARID1A
chr1	26766137	26766643	ARID1A
chr1	26767762	26768026	ARID1A
chr1	26771090	26771354	ARID1A
chr1	26772421	26772709	ARID1A
chr1	26772779	26773019	ARID1A
chr1	26773264	26773981	ARID1A
chr1	26774294	26775254	ARID1A
chr1	26775497	26775978	ARID1A
chr1	26778989	26780789	ARID1A
chr2	197392225	197392537	SF3B1
chr2	197392935	197393223	SF3B1
chr2	197396023	197396359	SF3B1
chr2	197397906	197398194	SF3B1
chr2	197398376	197398664	SF3B1
chr2	197398890	197399106	SF3B1
chr2	197399978	197400462	SF3B1
chr2	197400681	197400969	SF3B1
chr2	197401318	197401606	SF3B1
chr2	197401658	197402213	SF3B1
chr2	197402522	197402858	SF3B1
chr2	197402871	197403111	SF3B1
chr2	197403554	197403794	SF3B1
chr2	197404994	197405505	SF3B1
chr2	197407914	197408202	SF3B1
chr2	197408342	197408606	SF3B1
chr2	197409744	197410032	SF3B1
chr2	197416705	197416945	SF3B1
chr2	197418428	197418668	SF3B1
chr2	197418857	197419025	SF3B1
chr2	197420303	197420615	SF3B1
chr2	197420948	197421212	SF3B1
chr2	197423770	197424010	SF3B1
chr2	197434889	197435081	SF3B1
chr3	52401640	52402192	BAP1
chr3	52402210	52402498	BAP1
chr3	52402517	52403015	BAP1
chr3	52403061	52403373	BAP1
chr3	52403378	52403930	BAP1
chr3	52404375	52404663	BAP1
chr3	52405081	52405321	BAP1
chr3	52405682	52405994	BAP1
chr3	52406170	52406458	BAP1
chr3	52406747	52406987	BAP1
chr3	52407088	52407537	BAP1
chr3	52407873	52408161	BAP1
chr3	52408395	52408683	BAP1
chr3	52409472	52409955	BAP1
chr3	52548028	52548268	PBRM1
chr3	52550384	52550901	PBRM1
chr3	52554645	52554957	PBRM1
chr3	52558174	52558486	PBRM1
chr3	52561735	52561999	PBRM1
chr3	52563255	52563519	PBRM1
chr3	52564021	52564261	PBRM1
chr3	52576463	52576775	PBRM1
chr3	52578970	52579282	PBRM1
chr3	52586388	52586724	PBRM1
chr3	52587275	52587587	PBRM1
chr3	52589042	52589282	PBRM1
chr3	52603494	52603758	PBRM1
chr3	52609285	52609981	PBRM1
chr3	52615271	52615535	PBRM1
chr3	52617231	52617567	PBRM1
chr3	52624822	52625014	PBRM1
chr3	52627189	52627453	PBRM1
chr3	52628820	52629108	PBRM1
chr3	52634576	52634840	PBRM1
chr3	52641879	52642119	PBRM1
chr3	52643163	52643427	PBRM1
chr3	52644626	52644866	PBRM1
chr3	52648260	52648524	PBRM1
chr3	52651667	52651883	PBRM1
chr3	52658124	52658388	PBRM1
chr3	52662048	52662360	PBRM1
chr3	52668415	52668727	PBRM1
chr3	52678416	52678680	PBRM1
chr3	52679498	52679786	PBRM1
chr3	179198798	179199206	PIK3CA
chr3	179199662	179199926	PIK3CA
chr3	179201258	179201570	PIK3CA
chr3	179203510	179203822	PIK3CA
chr3	179204425	179204665	PIK3CA
chr3	179209515	179209779	PIK3CA
chr3	179210105	179210641	PIK3CA
chr3	179218127	179218415	PIK3CA
chr3	179219116	179219356	PIK3CA
chr3	179219496	179219808	PIK3CA
chr3	179219868	179220132	PIK3CA
chr3	179220951	179221191	PIK3CA
chr3	179224001	179224265	PIK3CA
chr3	179224616	179224904	PIK3CA
chr3	179225880	179226120	PIK3CA
chr3	179229236	179229476	PIK3CA
chr3	179229930	179230456	PIK3CA
chr3	179234060	179234396	PIK3CA
chr5	56815538	56816090	MAP3K1
chr5	56856518	56856830	MAP3K1
chr5	56859682	56859946	MAP3K1
chr5	56864701	56864965	MAP3K1
chr5	56865265	56865529	MAP3K1
chr5	56865746	56866058	MAP3K1
chr5	56871826	56872114	MAP3K1
chr5	56872561	56873034	MAP3K1
chr5	56875002	56875338	MAP3K1
chr5	56878896	56879184	MAP3K1
chr5	56880636	56880876	MAP3K1
chr5	56881057	56881297	MAP3K1
chr5	56881533	56882901	MAP3K1
chr5	56883446	56883758	MAP3K1
chr5	56884588	56884900	MAP3K1
chr5	56885853	56886141	MAP3K1
chr5	56887292	56887604	MAP3K1
chr5	56888147	56888435	MAP3K1
chr5	56893449	56893761	MAP3K1
chr5	68226650	68227034	PIK3R1
chr5	68239821	68240013	PIK3R1
chr5	68273315	68273555	PIK3R1
chr5	68273855	68274095	PIK3R1
chr5	68279523	68279811	PIK3R1
chr5	68280496	68280760	PIK3R1
chr5	68280846	68281086	PIK3R1
chr5	68288659	68288827	PIK3R1
chr5	68290649	68290913	PIK3R1
chr5	68292177	68292600	PIK3R1
chr5	68293017	68293512	PIK3R1
chr5	68293627	68293915	PIK3R1
chr5	68294450	68294762	PIK3R1
chr5	68295115	68295561	PIK3R1
chr5	68296135	68296375	PIK3R1
chr5	68297386	68297626	PIK3R1
chr6	151807886	151808390	ESR1
chr6	151842562	151842826	ESR1
chr6	151880580	151880844	ESR1
chr6	151944136	151944544	ESR1
chr6	152011580	152011868	ESR1
chr6	152060913	152061201	ESR1
chr6	152094356	152094596	ESR1
chr6	152098704	152098992	ESR1
chr6	152125186	152125426	ESR1
chr7	140726408	140726600	BRAF
chr7	140734562	140734802	BRAF
chr7	140739734	140740022	BRAF
chr7	140747334	140747526	BRAF
chr7	140749208	140749496	BRAF
chr7	140753189	140753477	BRAF
chr7	140754101	140754317	BRAF
chr7	140776879	140777119	BRAF
chr7	140777912	140778152	BRAF
chr7	140781502	140781766	BRAF
chr7	140782944	140783232	BRAF
chr7	140787469	140787661	BRAF
chr7	140794231	140794543	BRAF
chr7	140800277	140800565	BRAF
chr7	140801329	140801641	BRAF
chr7	140807878	140808142	BRAF
chr7	140808221	140808389	BRAF
chr7	140808811	140809075	BRAF
chr7	140834572	140834908	BRAF
chr7	140850029	140850293	BRAF
chr7	140924490	140924778	BRAF
chr10	8055619	8055931	GATA3
chr10	8058272	8058872	GATA3
chr10	8063909	8064221	GATA3
chr10	8069391	8069679	GATA3
chr10	8073712	8074048	GATA3
chr10	87863912	87864584	PTEN
chr10	87893946	87894186	PTEN
chr10	87925438	87925630	PTEN
chr10	87930971	87931163	PTEN
chr10	87932975	87933287	PTEN
chr10	87942530	87942770	PTEN
chr10	87952044	87952332	PTEN
chr10	87957815	87958055	PTEN
chr10	87960866	87961154	PTEN
chr10	87965259	87965499	PTEN
chr11	532551	532839	HRAS
chr11	533197	533688	HRAS
chr11	533734	533974	HRAS
chr11	534134	534398	HRAS
chr11	64804298	64804850	MEN1
chr11	64804959	64805271	MEN1
chr11	64805558	64805846	MEN1
chr11	64806155	64806443	MEN1
chr11	64806934	64807294	MEN1
chr11	64807471	64807759	MEN1
chr11	64807862	64808126	MEN1
chr11	64809615	64810143	MEN1
chr11	108227540	108227963	ATM
chr11	108229098	108229410	ATM
chr11	108235637	108235877	ATM
chr11	108243879	108244191	ATM
chr11	108244750	108245062	ATM
chr11	108246889	108247201	ATM
chr11	108248897	108249137	ATM
chr11	108250670	108251102	ATM
chr11	108251801	108252065	ATM
chr11	108252732	108252996	ATM
chr11	108253782	108254070	ATM
chr11	108256133	108256421	ATM
chr11	108257399	108257687	ATM
chr11	108258910	108259150	ATM
chr11	108267136	108267376	ATM
chr11	108268377	108268641	ATM
chr11	108270984	108271484	ATM
chr11	108272449	108272930	ATM
chr11	108279417	108279681	ATM
chr11	108280961	108281201	ATM
chr11	108282674	108282914	ATM
chr11	108284193	108284505	ATM
chr11	108287525	108287789	ATM
chr11	108288895	108289183	ATM
chr11	108289569	108289833	ATM
chr11	108292585	108292825	ATM
chr11	108293238	108293550	ATM
chr11	108294848	108295136	ATM
chr11	108297202	108297466	ATM
chr11	108299679	108299919	ATM
chr11	108301574	108301862	ATM
chr11	108302820	108303060	ATM
chr11	108304643	108304883	ATM
chr11	108307820	108308060	ATM
chr11	108310081	108310393	ATM
chr11	108312334	108312574	ATM
chr11	108315746	108316193	ATM
chr11	108317290	108317602	ATM
chr11	108319873	108320137	ATM
chr11	108321216	108321504	ATM
chr11	108325282	108325570	ATM
chr11	108326021	108326261	ATM
chr11	108327569	108327833	ATM
chr11	108328985	108329273	ATM
chr11	108330185	108330449	ATM
chr11	108331368	108331632	ATM
chr11	108331801	108332113	ATM
chr11	108332686	108332974	ATM
chr11	108333806	108334046	ATM
chr11	108334894	108335182	ATM
chr11	108335770	108336034	ATM
chr11	108343140	108343452	ATM
chr11	108345669	108345981	ATM
chr11	108347201	108347441	ATM
chr11	108353690	108353954	ATM
chr11	108354734	108354950	ATM
chr11	108365005	108365293	ATM
chr11	108365296	108365536	ATM
chr12	12717812	12718340	CDKN1B
chr12	12718741	12719029	CDKN1B
chr12	12720979	12721291	CDKN1B
chr12	25209720	25209984	KRAS
chr12	25215356	25215644	KRAS
chr12	25225537	25225849	KRAS
chr12	25227202	25227442	KRAS
chr12	25235131	25235299	KRAS
chr12	25245196	25245460	KRAS
chr12	114671807	114672335	TBX3
chr12	114674127	114674871	TBX3
chr12	114676235	114676547	TBX3
chr12	114677497	114677737	TBX3
chr12	114679421	114679733	TBX3
chr12	114679834	114680050	TBX3
chr12	114680844	114681180	TBX3
chr12	114682777	114683233	TBX3
chr13	32316385	32316601	BRCA2
chr13	32319044	32319356	BRCA2
chr13	32324997	32325261	BRCA2
chr13	32326017	32326357	BRCA2
chr13	32326423	32326687	BRCA2
chr13	32329359	32329575	BRCA2
chr13	32330842	32331106	BRCA2
chr13	32332241	32333417	BRCA2
chr13	32336234	32341226	BRCA2
chr13	32344473	32344737	BRCA2
chr13	32346753	32346969	BRCA2
chr13	32354834	32355314	BRCA2
chr13	32356398	32356638	BRCA2
chr13	32357715	32357955	BRCA2
chr13	32362487	32362727	BRCA2
chr13	32363151	32363559	BRCA2
chr13	32370323	32370635	BRCA2
chr13	32370871	32371183	BRCA2
chr13	32375266	32375482	BRCA2
chr13	32376586	32376874	BRCA2
chr13	32379283	32379547	BRCA2
chr13	32379675	32380219	BRCA2
chr13	32394654	32394966	BRCA2
chr13	32395960	32396170	BRCA2
chr13	32396081	32396117	BRCA2
chr13	32396814	32397126	BRCA2
chr13	32398129	32398801	BRCA2
chr13	48303836	48304124	RB1
chr13	48307198	48307486	RB1
chr13	48342524	48342788	RB1
chr13	48344995	48345283	RB1
chr13	48347747	48347939	RB1
chr13	48348881	48349097	RB1
chr13	48359939	48360203	RB1
chr13	48362729	48363041	RB1
chr13	48364812	48365052	RB1
chr13	48367416	48367680	RB1
chr13	48368445	48368685	RB1
chr13	48373328	48373568	RB1
chr13	48376843	48377107	RB1
chr13	48379493	48379709	RB1
chr13	48379972	48380322	RB1
chr13	48381212	48381476	RB1
chr13	48452907	48453195	RB1
chr13	48456120	48456432	RB1
chr13	48459603	48459915	RB1
chr13	48463650	48463914	RB1
chr13	48464922	48465442	RB1
chr13	48473278	48473470	RB1
chr13	48476615	48476927	RB1
chr13	48477271	48477487	RB1
chr13	48479914	48480154	RB1
chr14	104769509	104769701	AKT1
chr14	104770260	104770500	AKT1
chr14	104770663	104770927	AKT1
chr14	104771727	104771895	AKT1
chr14	104772288	104772528	AKT1
chr14	104772840	104773128	AKT1
chr14	104773170	104773661	AKT1
chr14	104773837	104774053	AKT1
chr14	104774862	104775285	AKT1
chr14	104775569	104775881	AKT1
chr14	104776582	104776846	AKT1
chr14	104780007	104780295	AKT1
chr14	104792524	104792716	AKT1
chr16	67029326	67029566	CBFB
chr16	67029649	67029889	CBFB
chr16	67036564	67036828	CBFB
chr16	67066607	67066871	CBFB
chr16	67082131	67082419	CBFB
chr16	67098635	67098851	CBFB
chr16	67610802	67611642	CTCF
chr16	67611915	67612155	CTCF
chr16	67616667	67616955	CTCF
chr16	67620612	67620900	CTCF
chr16	67621360	67621672	CTCF
chr16	67626478	67626790	CTCF
chr16	67628340	67628580	CTCF
chr16	67629321	67629609	CTCF
chr16	67636614	67636926	CTCF
chr16	67637659	67637899	CTCF
chr16	68737331	68737547	CDH1
chr16	68738221	68738485	CDH1
chr16	68801637	68801925	CDH1
chr16	68808339	68808926	CDH1
chr16	68810112	68810424	CDH1
chr16	68811651	68811891	CDH1
chr16	68812054	68812342	CDH1
chr16	68813281	68813593	CDH1
chr16	68815480	68815792	CDH1
chr16	68819196	68819508	CDH1
chr16	68821968	68822256	CDH1
chr16	68823368	68823656	CDH1
chr16	68826446	68826638	CDH1
chr16	68828094	68828382	CDH1
chr16	68829569	68829881	CDH1
chr16	68833262	68833526	CDH1
chr16	68834151	68834391	CDH1
chr17	7661816	7662103	TP53
chr17	7666154	7666346	TP53
chr17	7661914	7661935	TP53
chr17	7667144	7667456	TP53
chr17	7669529	7669769	TP53
chr17	7670529	7670793	TP53
chr17	7673134	7673422	TP53
chr17	7673451	7673912	TP53
chr17	7674103	7674367	TP53
chr17	7674782	7675265	TP53
chr17	7675964	7676300	TP53
chr17	7676308	7676677	TP53
chr17	12020811	12021075	MAP2K4
chr17	12032185	12032377	MAP2K4
chr17	12054807	12055071	MAP2K4
chr17	12081322	12081562	MAP2K4
chr17	12095490	12095778	MAP2K4
chr17	12107705	12107993	MAP2K4
chr17	12110292	12110508	MAP2K4
chr17	12113152	12113440	MAP2K4
chr17	12125212	12125452	MAP2K4
chr17	12129056	12129368	MAP2K4
chr17	12139765	12139957	MAP2K4
chr17	12141071	12141335	MAP2K4
chr17	16032269	16032509	NCOR1
chr17	16034734	16034974	NCOR1
chr17	16039257	16039689	NCOR1
chr17	16040359	16040575	NCOR1
chr17	16046865	16047177	NCOR1
chr17	16048760	16049072	NCOR1
chr17	16057481	16057769	NCOR1
chr17	16057829	16058141	NCOR1
chr17	16058390	16058678	NCOR1
chr17	16061371	16061923	NCOR1
chr17	16062031	16062343	NCOR1
chr17	16063983	16064271	NCOR1
chr17	16064788	16065100	NCOR1
chr17	16065457	16065721	NCOR1
chr17	16067863	16068151	NCOR1
chr17	16070128	16070560	NCOR1
chr17	16071380	16071692	NCOR1
chr17	16072066	16072306	NCOR1
chr17	16073354	16073642	NCOR1
chr17	16075497	16075737	NCOR1
chr17	16079881	16080145	NCOR1
chr17	16080326	16080810	NCOR1
chr17	16086205	16086517	NCOR1
chr17	16087138	16087378	NCOR1
chr17	16091824	16092088	NCOR1
chr17	16098287	16098575	NCOR1
chr17	16101215	16101839	NCOR1
chr17	16108704	16108992	NCOR1
chr17	16117813	16118101	NCOR1
chr17	16119345	16119561	NCOR1
chr17	16121016	16121304	NCOR1
chr17	16126001	16126289	NCOR1
chr17	16137229	16137493	NCOR1
chr17	16138076	16138292	NCOR1
chr17	16138976	16139216	NCOR1
chr17	16143530	16143770	NCOR1
chr17	16146341	16146581	NCOR1
chr17	16149375	16149591	NCOR1
chr17	16151506	16151698	NCOR1
chr17	16151863	16152079	NCOR1
chr17	16153258	16153474	NCOR1
chr17	16158684	16158948	NCOR1
chr17	16164949	16165189	NCOR1
chr17	16171767	16172055	NCOR1
chr17	16186476	16186764	NCOR1
chr17	16194383	16194647	NCOR1
chr17	31095132	31095444	NF1
chr17	31155898	31156210	NF1
chr17	31158931	31159171	NF1
chr17	31163148	31163412	NF1
chr17	31169811	31170075	NF1
chr17	31181347	31181563	NF1
chr17	31181627	31181867	NF1
chr17	31182430	31182742	NF1
chr17	31200388	31200628	NF1
chr17	31200953	31201241	NF1
chr17	31201327	31201567	NF1
chr17	31206161	31206449	NF1
chr17	31214373	31214661	NF1
chr17	31218929	31219193	NF1
chr17	31221775	31222063	NF1
chr17	31223361	31223649	NF1
chr17	31225016	31225328	NF1
chr17	31226403	31226715	NF1
chr17	31227134	31227374	NF1
chr17	31227444	31227684	NF1
chr17	31228992	31229496	NF1
chr17	31229760	31230048	NF1
chr17	31230176	31230464	NF1
chr17	31230763	31231003	NF1
chr17	31231998	31232262	NF1
chr17	31232670	31232910	NF1
chr17	31232975	31233239	NF1
chr17	31235535	31236101	NF1
chr17	31248907	31249195	NF1
chr17	31252860	31253076	NF1
chr17	31257606	31257798	NF1
chr17	31258266	31258578	NF1
chr17	31258948	31259212	NF1
chr17	31260285	31260597	NF1
chr17	31261627	31261939	NF1
chr17	31265151	31265415	NF1
chr17	31299425	31299689	NF1
chr17	31325783	31326287	NF1
chr17	31327464	31327872	NF1
chr17	31330264	31330528	NF1
chr17	31334588	31335066	NF1
chr17	31336258	31336546	NF1
chr17	31336606	31336942	NF1
chr17	31337330	31337618	NF1
chr17	31337740	31338214	NF1
chr17	31338622	31338886	NF1
chr17	31340430	31340718	NF1
chr17	31342927	31343215	NF1
chr17	31349041	31349329	NF1
chr17	31350106	31350394	NF1
chr17	31352179	31352491	NF1
chr17	31356376	31356664	NF1
chr17	31356880	31357168	NF1
chr17	31357186	31357450	NF1
chr17	31358394	31358706	NF1
chr17	31358883	31359099	NF1
chr17	31360454	31360742	NF1
chr17	31367143	31367359	NF1
chr17	31373927	31374239	NF1
chr17	31378813	31379005	NF1
chr17	39699477	39699669	ERBB2
chr17	39700154	39700394	ERBB2
chr17	39706957	39707221	ERBB2
chr17	39708295	39708559	ERBB2
chr17	39709240	39709528	ERBB2
chr17	39709738	39709954	ERBB2
chr17	39710011	39710554	ERBB2
chr17	39711843	39712131	ERBB2
chr17	39712240	39712528	ERBB2
chr17	39713053	39713353	ERBB2
chr17	39713198	39713294	ERBB2
chr17	39715202	39715610	ERBB2
chr17	39715707	39715971	ERBB2
chr17	39716222	39716679	ERBB2
chr17	39717245	39717557	ERBB2
chr17	39719702	39719918	ERBB2
chr17	39723243	39723742	ERBB2
chr17	39723828	39724092	ERBB2
chr17	39724698	39724938	ERBB2
chr17	39724970	39725484	ERBB2
chr17	39725623	39725935	ERBB2
chr17	39726478	39726742	ERBB2
chr17	39726788	39727028	ERBB2
chr17	39727264	39727576	ERBB2
chr17	39727662	39728070	ERBB2
chr17	43045595	43045883	BRCA1
chr17	43047564	43047780	BRCA1
chr17	43049037	43049277	BRCA1
chr17	43049980	43050172	BRCA1
chr17	43050981	43051197	BRCA1
chr17	43056973	43057213	BRCA1
chr17	43063256	43063448	BRCA1
chr17	43063792	43064032	BRCA1
chr17	43067531	43067771	BRCA1
chr17	43070890	43071274	BRCA1
chr17	43074293	43074557	BRCA1
chr17	43076406	43076694	BRCA1
chr17	43079258	43079474	BRCA1
chr17	43082369	43082609	BRCA1
chr17	43090867	43091107	BRCA1
chr17	43091295	43094895	BRCA1
chr17	43095763	43096003	BRCA1
chr17	43097170	43097362	BRCA1
chr17	43099695	43099959	BRCA1
chr17	43104047	43104335	BRCA1
chr17	43104791	43105031	BRCA1
chr17	43106374	43106614	BRCA1
chr17	43110460	43110652	BRCA1
chr17	43115644	43115860	BRCA1
chr17	43123936	43124176	BRCA1
chr17	43125099	43125267	BRCA1
chr18	51047014	51047326	SMAD4
chr18	51048652	51048892	SMAD4
chr18	51049213	51049405	SMAD4
chr18	51054754	51055018	SMAD4
chr18	51058040	51058529	SMAD4
chr18	51059782	51059998	SMAD4
chr18	51065394	51065634	SMAD4
chr18	51066982	51067222	SMAD4
chr18	51076604	51076844	SMAD4
chr18	51077229	51077397	SMAD4
chr18	51078229	51078493	SMAD4
chr21	34792108	34792636	RUNX1
chr21	34799225	34799537	RUNX1
chr21	34821585	34821777	RUNX1
chr21	34834373	34834637	RUNX1
chr21	34859393	34859657	RUNX1
chr21	34880478	34880790	RUNX1
chr21	34886809	34887145	RUNX1
chr21	34889598	34889814	RUNX1
chr21	34892847	34893039	RUNX1
chr21	35048762	35048978	RUNX1
chrX	41123544	41123808	USP9X
chrX	41128916	41129228	USP9X
chrX	41131376	41131616	USP9X
chrX	41134648	41134912	USP9X
chrX	41136768	41137056	USP9X
chrX	41140581	41140845	USP9X
chrX	41140935	41141505	USP9X
chrX	41143210	41143522	USP9X
chrX	41144441	41144705	USP9X
chrX	41148339	41148603	USP9X
chrX	41150844	41151132	USP9X
chrX	41152870	41153158	USP9X
chrX	41162713	41162953	USP9X
chrX	41165838	41166246	USP9X
chrX	41167397	41167661	USP9X
chrX	41167980	41168244	USP9X
chrX	41169958	41170270	USP9X
chrX	41170388	41170700	USP9X
chrX	41171753	41172041	USP9X
chrX	41183918	41184206	USP9X
chrX	41184367	41184703	USP9X
chrX	41186435	41186723	USP9X
chrX	41187910	41188198	USP9X
chrX	41189271	41189511	USP9X
chrX	41195822	41196086	USP9X
chrX	41196172	41196436	USP9X
chrX	41196508	41196820	USP9X
chrX	41197280	41197592	USP9X
chrX	41198494	41198782	USP9X
chrX	41201025	41201313	USP9X
chrX	41205265	41205529	USP9X
chrX	41210475	41210715	USP9X
chrX	41214494	41214782	USP9X
chrX	41215867	41216683	USP9X
chrX	41217137	41217425	USP9X
chrX	41218340	41218628	USP9X
chrX	41219022	41219310	USP9X
chrX	41223189	41223429	USP9X
chrX	41224707	41225212	USP9X
chrX	41229174	41229486	USP9X
chrX	41229540	41229852	USP9X
chrX	41230416	41230680	USP9X
chrX	41232311	41232599	USP9X
chrX	44873475	44873787	KDM6A
chrX	44873847	44874063	KDM6A
chrX	44961205	44961469	KDM6A
chrX	44974582	44974798	KDM6A
chrX	45010881	45011097	KDM6A
chrX	45020525	45020813	KDM6A
chrX	45034849	45035065	KDM6A
chrX	45037575	45037767	KDM6A
chrX	45051635	45051875	KDM6A
chrX	45053747	45054035	KDM6A
chrX	45058922	45059186	KDM6A
chrX	45059212	45059500	KDM6A
chrX	45059944	45060232	KDM6A
chrX	45060530	45060842	KDM6A
chrX	45061239	45061503	KDM6A
chrX	45062565	45062829	KDM6A
chrX	45063391	45063847	KDM6A
chrX	45069547	45070387	KDM6A
chrX	45076617	45076905	KDM6A
chrX	45078320	45078584	KDM6A
chrX	45079116	45079380	KDM6A
chrX	45082499	45082871	KDM6A
chrX	45083377	45083689	KDM6A
chrX	45085789	45086053	KDM6A
chrX	45089716	45089956	KDM6A
chrX	45090649	45090937	KDM6A
chrX	45106463	45106727	KDM6A
chrX	45107328	45107616	KDM6A
chrX	45110043	45110283	KDM6A
chrX	45111300	45111492	KDM6A
